# Supplementary material for: A Simple RNA Target Capture NGS Strategy for Fusion Genes Assessment in the Diagnostics of Pediatric B-cell Acute Lymphoblastic Leukemia
Source: PubMed Central journal article supplement (PMC6746019; doi:10.1097/hs9.0000000000000250), 2019-05-22

Supplementary Table 1. A detailed description of each patient and the corresponding fusion genes identified by our OP.

| <i>sample</i> | <i>%blast</i> | <i>group</i> | <i>FASTQC</i> | <i>fusion gene</i>          | <i>probes</i> | <i>coverage</i> | <i>progn.</i> | <i>PCR</i> | <i>Fusionhub</i>                                                |
|---------------|---------------|--------------|---------------|-----------------------------|---------------|-----------------|---------------|------------|-----------------------------------------------------------------|
| <i>HR1</i>    | 71            | HR           | +             | -                           |               | -               | -             | -          | -                                                               |
| <i>HR2</i>    | 74            | HR           | +             | t(19;19)<br>TCF3-OAZ1       | f             | 54              | -             | +          | NOVEL                                                           |
| <i>HR3</i>    | 50            | HR           | +             | t(5;5)<br>PDGFRB-<br>EBF1   | f/r           | 279             | +             | +          | ['CHIMERSEQ', 'CHITARS', 'Known_Fusions']                       |
| <i>HR4</i>    | -             | HR           | +             | t(2;9) ZEB2-<br>JAK2        | r             | 89              | +             | +          | NOVEL                                                           |
| <i>HR4</i>    | -             | HR           | +             | t(7;7)<br>IKZF1-DDC         | f             | 45              | -             | +          | NOVEL                                                           |
| <i>HR5</i>    | 93            | HR           | +             | -                           |               | -               | -             | -          | -                                                               |
| <i>HR6</i>    | -             | HR           | +             | t(9;17)<br>MPRIIP-<br>JAK2  | r             | 61              | +             | +          | NOVEL                                                           |
| <i>HR7</i>    | 24-Jan        | HR           | +             | t(5;5)<br>PDGFRB-<br>EBF1   | f/r           | 93              | +             | +          | ['CHIMERSEQ', 'CHITARS', 'Known_Fusions']                       |
| <i>HR8</i>    | 80            | HR           | +             | t(9;9) PAX5-<br>JAK2        | f/r           | 44              | +             | +          | ['COSMIC', 'CHIMERKB', 'FARE-CAFE', 'TICDB']                    |
| <i>HR9</i>    | 90            | HR           | +             | -                           |               | -               | -             | -          | -                                                               |
| <i>HR10</i>   | 93            | HR           | +             | -                           |               | -               | -             | -          | -                                                               |
| <i>HR11</i>   | 81            | HR           | +             | -                           |               | -               | -             | -          | -                                                               |
| <i>HR12</i>   | 82            | HR           | +             | t(12;19)<br>ZNF384-<br>TCF3 | f/r           | 33              | +             | +          | ['CHIMERSEQ', 'CHITARS', 'FARE-CAFE', 'TICDB', 'Known_Fusions'] |
| <i>HR13</i>   | 86            | HR           | +             | -                           |               | -               | -             | -          | -                                                               |
| <i>HR14</i>   | 94            | HR           | +             | -                           |               | -               | -             | -          | -                                                               |
| <i>HR15</i>   | 90            | HR           | +             | -                           |               | -               | -             | -          | -                                                               |
| <i>HR16</i>   | 96            | HR           | +             | -                           |               | -               | -             | -          | -                                                               |

|             |      |      |   |                               |     |     |   |   |                                                |
|-------------|------|------|---|-------------------------------|-----|-----|---|---|------------------------------------------------|
| <i>PT1</i>  | 91.6 | TP1+ | + | del(X)<br>P2RY8-<br>CRLF2     | f/r | 27  | + | + | ['CHIMERPUB', 'FARE-CAFE', 'TICDB']            |
| <i>PT2</i>  | 90   | TP1+ | + | -                             |     | -   | - | - | -                                              |
| <i>PT3</i>  | 83   | TP1+ | + | del(X)<br>P2RY8-<br>CRLF2     | f/r | 31  | + | + | ['CHIMERPUB', 'FARE-CAFE', 'TICDB']            |
| <i>PT4</i>  | -    | TP1+ | + | -                             |     | -   | - | - | -                                              |
| <i>PT5</i>  | 90   | TP1+ | + | -                             |     | -   | - | - | -                                              |
| <i>PT6</i>  | 50   | TP1+ | + | t(11;11)<br>KMT2A-<br>USP2    | f/r | 156 | + | + | ['Known_Fusions']                              |
| <i>PT7</i>  | 88.3 | TP1+ | + | t(9;20)<br>PAX5-<br>C20orf112 | f   | 76  | + | + | ['CHIMERSEQ', 'CHITARS', 'FARE-CAFE', 'TICDB'] |
| <i>PT8</i>  | 83   | TP1+ | + | -                             |     | -   | - | - | -                                              |
| <i>PT9</i>  | 90   | TP1+ | + | -                             |     | -   | - | - | -                                              |
| <i>PT10</i> | 86   | TP1+ | + | t(17;19)<br>TCF3-HLF          | f/r | 45  | + | + | ['CHIMERSEQ', 'CHITARS', 'FARE-CAFE', 'TICDB'] |
| <i>PT10</i> | 86   | TP1+ | + | t(5;5)<br>CAMK2A-<br>CD74     | f/r | 53  | - | + | ['Known_Fusions']                              |
| <i>PT10</i> | 86   | TP1+ | + | t(10;10)<br>PTEN-RNLS         | f   | 13  | - | + | ['Tumor_Fusion_GDP']                           |
| <i>PT11</i> | 87   | TP1+ | + | t(5;5)<br>CAMK2A-<br>CD74     | f/r | 21  | - | + | ['Known_Fusions']                              |
| <i>PT12</i> | 80   | TP1+ | + | -                             |     | -   | - | - | -                                              |
| <i>PT13</i> | 40   | TP1+ | + | -                             |     | -   | - | - | -                                              |
| <i>PT14</i> | 79   | TP1+ | + | -                             |     | -   | - | - | -                                              |
| <i>PT15</i> | 88   | TP1+ | + | t(12;19)<br>ETV6-JAK3         | f/r | 54  | + | + | NOVEL                                          |
| <i>PT15</i> | 88   | TP1+ | + | t(17;17)<br>SUZ12P1-<br>CRLF3 | f   | 14  | - | + | ['18_Cancers']                                 |
| <i>PT16</i> | 86.6 | TP1+ | + | -                             |     | -   | - | - | -                                              |

|             |    |      |   |                              |     |     |   |   |                                                                                |
|-------------|----|------|---|------------------------------|-----|-----|---|---|--------------------------------------------------------------------------------|
| <i>PT17</i> | 55 | TP1+ | + | -                            |     | -   | - | - | -                                                                              |
| <i>PT18</i> | 53 | TP1+ | + | t(12;22)<br>ZNF384-<br>EP300 | f/r | 234 | + | + | ['CHIMERPUB']                                                                  |
| <i>PT19</i> | 80 | TP1+ | + | t(5;5)<br>CAMK2A-<br>CD74    | f/r | 12  | - | + | ['Known_Fusions']                                                              |
| <i>PT19</i> | 80 | TP1+ | + | t(19;19)<br>DOT1L-<br>OAZ1   | f   | 12  | - | + | ['HPA', 'Banned_Dataset']                                                      |
| <i>PT20</i> | 52 | TP1+ | + | t(5;5)<br>PDGFRB-<br>EBF1    | f/r | 175 | + | + | ['CHIMERSEQ', 'CHITARS', 'Known_Fusions']                                      |
| <i>PT21</i> | 83 | TP1+ | + | -                            |     | -   | - | - | -                                                                              |
| <i>PT22</i> | 90 | TP1+ | + | -                            |     | -   | - | - | -                                                                              |
| <i>PT23</i> | 82 | TP1+ | + | -                            |     | -   | - | - | -                                                                              |
| <i>PT24</i> | 36 | TP1+ | + | -                            |     | -   | - | - | -                                                                              |
| <i>PT25</i> | 76 | TP1+ | + | t(8;8)<br>NDRG1-<br>ST3GAL1  | f   | 14  | - | + | ['CHIMERSEQ',<br>'Tumor_Fusion_GDP', 'HPA', 'Banned_dataset', 'Known_Fusions'] |
| <i>PT26</i> | 81 | TP1+ | + | -                            |     | -   | - | - | -                                                                              |
| <i>PT27</i> | 96 | TP1+ | + | -                            |     | -   | - | - | -                                                                              |
| <i>PT28</i> | 90 | TP1+ | + | t(17;19)<br>TCF3-HLF         | f/r | 100 | + | + | ['CHIMERKB', 'CHIMERPUB', 'FARE-CAFE', 'TICDB']                                |
| <i>PT29</i> | 96 | TP1+ | + | t(5;5)<br>PDGFRB-<br>EBF1    | f/r | 37  | + | + | ['CHIMERSEQ', 'CHITARS', 'Known_Fusions']                                      |
| <i>PT29</i> | 96 | TP1+ | + | t(5;5)<br>ARHGAP26-<br>NR3C1 | f/r | 19  | - | + | ['HPA', 'Banned_Dataset', 'GTEEx']                                             |
| <i>PT30</i> | 87 | TP1+ | + | -                            |     | -   | - | - | -                                                                              |
| <i>PT31</i> | 56 | TP1+ | + | -                            |     | -   | - | - | -                                                                              |
| <i>PT32</i> | 90 | TP1+ | + | -                            |     | -   | - | - | -                                                                              |
| <i>PT33</i> | 70 | TP1+ | + | t(10;10)<br>PTEN-RNLS        | f   | 16  | - | + | ['Tumor_Fusion_GDP']                                                           |

|             |    |      |   |                             |     |    |   |   |                                                                             |
|-------------|----|------|---|-----------------------------|-----|----|---|---|-----------------------------------------------------------------------------|
| <i>PT34</i> | 82 | TP1+ | + | t(13;13)<br>PSPC1-<br>ZMYM2 | r   | 15 | - | + | ['Banned_Dataset','GTEX']                                                   |
| <i>PT35</i> | 80 | TP1+ | + | -                           |     | -  | - | - | -                                                                           |
| <i>PT36</i> | 90 | TP1+ | + | -                           |     | -  | - | - | -                                                                           |
| <i>PT37</i> | 72 | TP1+ | + | t(13;13)<br>PSPC1-<br>ZMYM2 | r   | 10 | - | + | ['Banned_Dataset','GTEX']                                                   |
| <i>PT38</i> | 67 | TP1+ | + | t(12;12)<br>BCL7A-<br>NCOR2 | f/r | 21 | - | + | ['Known_Fusions']                                                           |
| <i>PT38</i> | 67 | TP1+ | + | t(13;13)<br>PSPC1-<br>ZMYM2 | r   | 10 | - | + | ['Banned_Dataset','GTEX']                                                   |
| <i>PT39</i> | 82 | TP1+ | + | -                           |     | -  | - | - | -                                                                           |
| <i>PT40</i> | 76 | TP1+ | + | -                           |     | -  | - | - | -                                                                           |
| <i>PT41</i> | 63 | TP1+ | + | t(19;19)<br>DOT1L-<br>OAZ1  | f   | 16 | - | + | ['HPA', 'Banned_Dataset']                                                   |
| <i>PT41</i> | 63 | TP1+ | + | t(8;8)<br>NDRG1-<br>ST3GAL1 | f   | 16 | - | + | ['CHIMERSEQ',<br>'Tumor_Fusion_GDP','HPA','Banned_dataset','Known_Fusions'] |
| <i>PT42</i> | 45 | TP1+ | + | -                           |     | -  | - | - | -                                                                           |
| <i>PT43</i> | 52 | TP1+ | + | -                           |     | -  | - | - | -                                                                           |
| <i>PT44</i> | 80 | TP1+ | + | -                           |     | -  | - | - | -                                                                           |
| <i>PT45</i> | 86 | TP1+ | + | -                           |     | -  | - | - | -                                                                           |
| <i>PT46</i> | 55 | TP1+ | + | del(X)<br>P2RY8-<br>CRLF2   | f/r | 24 | + | + | ['CHIMERPUB', 'FARE-CAFE', 'TICDB']                                         |
| <i>PT46</i> | 55 | TP1+ | + | t(8;8)<br>NDRG1-<br>ST3GAL1 | f   | 23 | - | + | ['CHIMERSEQ',<br>'Tumor_Fusion_GDP','HPA','Banned_dataset','Known_Fusions'] |
| <i>PT47</i> | 86 | TP1+ | + | -                           |     | -  | - | - | -                                                                           |
| <i>PT48</i> | 78 | TP1+ | + | -                           |     | -  | - | - | -                                                                           |
| <i>PT49</i> | 92 | TP1+ | + | -                           |     | -  | - | - | -                                                                           |

|             |    |    |   |                              |     |    |   |   |                                                                                |
|-------------|----|----|---|------------------------------|-----|----|---|---|--------------------------------------------------------------------------------|
| <i>RL1</i>  | 63 | RL | + | t(10;11)<br>MLLT10-<br>KMT2A | f/r | 29 | + | + | ['CHIMERKB', 'CHIMERPUB']                                                      |
| <i>RL2</i>  | 48 | RL | + | -                            |     | -  | - | - | -                                                                              |
| <i>RL3</i>  | 80 | RL | + | -                            |     | -  | - | - | -                                                                              |
| <i>RL4</i>  | 48 | RL | - | -                            |     | -  | - | - | -                                                                              |
| <i>RL5</i>  | 76 | RL | + | -                            |     | -  | - | - | -                                                                              |
| <i>RL6</i>  | 76 | RL | + | del(X)<br>P2RY8-<br>CRLF2    | f/r | 34 | + | + | ['CHIMERPUB', 'FARE-CAFE', 'TICDB']                                            |
| <i>RL7</i>  | 65 | RL | + | t(5;5)<br>CAMKA2A-<br>CD74   | f/r | 47 | - | + | NOVEL                                                                          |
| <i>RL7</i>  | 65 | RL | + | t(8;8)<br>NDRG1-<br>ST3GAL1  | f   | 30 | - | + | ['CHIMERSEQ',<br>'Tumor_Fusion_GDP', 'HPA', 'Banned_dataset', 'Known_Fusions'] |
| <i>RL8</i>  | 95 | RL | + | t(3;9)<br>MBNL1-<br>PAX5     | f/r | 23 | + | + | ['Known_Fusions']                                                              |
| <i>RL9</i>  | 94 | RL | + | -                            |     | -  | - | - | -                                                                              |
| <i>RL10</i> | 87 | RL | + | t(5;5)<br>CAMK2A-<br>CD74    | f/r | 13 | - | + | ['Known_Fusions']                                                              |
| <i>RL10</i> | 87 | RL | + | t(8;8)<br>NDRG1-<br>ST3GAL1  | f   | 22 | - | + | ['CHIMERSEQ',<br>'Tumor_Fusion_GDP', 'HPA', 'Banned_dataset', 'Known_Fusions'] |
| <i>RL11</i> | 89 | RL | + | -                            |     | -  | - | - | -                                                                              |
| <i>RL12</i> | 92 | RL | + | t(8;8)<br>NDRG1-<br>ST3GAL1  | f   | 33 | - | + | ['CHIMERSEQ',<br>'Tumor_Fusion_GDP', 'HPA', 'Banned_dataset', 'Known_Fusions'] |
| <i>RL12</i> | 92 | RL | + | t(19;19)<br>TCF3-OAZ1        | f   | 43 | - | + | NOVEL                                                                          |
| <i>RL12</i> | 92 | RL | + | t(19;19)<br>DOT1L-<br>OAZ1   | f   | 35 | - | + | ['HPA', 'Banned_Dataset']                                                      |

|             |    |    |   |                              |     |     |   |   |                                                                                                                         |
|-------------|----|----|---|------------------------------|-----|-----|---|---|-------------------------------------------------------------------------------------------------------------------------|
| <i>RL13</i> | 90 | RL | + | del(X)<br>P2RY8-<br>CRLF2    | f/r | 71  | + | + | ['CHIMERPUB', 'FARE-CAFE', 'TICDB']                                                                                     |
| <i>RL15</i> | 89 | RL | + | t(9;9)<br>NUP214-<br>ABL1    | f/r | 228 | + | + | ['COSMIC', 'CHIMERAkB', 'CHIMERPUB', 'CHIMERSEQ',<br>'FARE-CAFE',<br>'TICDB', 'TUMOR_Fusion_GDP', 'Oesophagus_Dataset'] |
| <i>RL16</i> | 60 | RL | - | -                            |     | -   | - | - | -                                                                                                                       |
| <i>RL17</i> | 12 | RL | + | t(13;13)<br>RB1-<br>RCBTB2   | f   | 8   | - | + | ['GTEX']                                                                                                                |
| <i>RL18</i> | 12 | RL | + | -                            |     | -   | - | - | -                                                                                                                       |
| <i>RL19</i> | 96 | RL | + | -                            |     | -   | - | - | -                                                                                                                       |
| <i>RL20</i> | 12 | RL | + | t(13;13)<br>RB1-<br>RCBTB2   | f   | 12  | - | + | ['GTEX']                                                                                                                |
| <i>RL21</i> | 65 | RL | + | -                            |     | -   | - | - | -                                                                                                                       |
| <i>RL22</i> | 85 | RL | + | t(21;21)<br>RUNX1-<br>DYRK1A | f   | 54  | + | + | ['GTEX']                                                                                                                |
| <i>RL23</i> | 83 | RL | + | -                            |     | -   | - | - | -                                                                                                                       |
| <i>RL24</i> | -  | RL | + | -                            |     | -   | - | - | -                                                                                                                       |
| <i>RL25</i> | 94 | RL | + | t(5;5)<br>ARHGAP26-<br>NR3C1 | f/r | 14  | - | + | ['HPA', 'Banned_Dataset', 'GTEX']                                                                                       |

Supplementary Table 2: RT-PCR forward and reverse primer sequences for the validated fusion transcripts, and the corresponding Sanger Sequencing File Name.

| <i>fusion genes</i>                         | <i>forward</i> | <i>5'-3' sequence</i>         | <i>reverse</i> | <i>5'-3' sequence</i>         | <i>product size</i>    | <i>File Name (.ab)</i>         |
|---------------------------------------------|----------------|-------------------------------|----------------|-------------------------------|------------------------|--------------------------------|
| <i>t(11;11)</i><br><b>KMT2A-<br/>USP2</b>   | MLLex19_F      | AAGGTCCTGGAGAACCAGACT         | USP2ex5_R      | AGATGGGCTCACCACATCATT         | 701                    | MLL-<br>USP2_FOR_52CF79;       |
| <i>t(12;19)</i><br><b>ETV6-JAK3</b>         | ETV6 ex3_F     | GGAGCAGGGATGACGTAGC           | JAK3 ex19_R    | ACCAGGGCACCTGTATTGTC          | 487                    | ETV6-<br>JAK3_FOR_93DG11;      |
| <i>t(12;19)</i><br><b>ZNF384-<br/>TCF3</b>  | TCF3ex11 F     | ATGGAGCAGAGGTGAACGGT          | ZNF384ex6 R    | TGGGGAAGGTCTGAGCTGAT          | 687                    | ZNF384-<br>TCF3_FOR_81FI62;    |
| <i>t(12;22)</i><br><b>ZNF384-<br/>EP300</b> | EP300ex6_F     | TCCCCCTCAAAAATGCTGGT          | ZNF384ex4_R    | ATTCTGGGTAACGGACGCTT          | 551                    | ZNF384-<br>EP300_FOR_93DH34;   |
| <i>t(13;13)</i><br><b>RB1-<br/>RCBTB2</b>   | RCBTB2ex11_F   | CTGCACTGACGACGTGTTTG          | RB1ex18_R      | CTGCTGCAGTGTGATTATTCTGG       | 307                    | RB1-<br>RCBTB2_FOR_98EG11;     |
| <i>t(17;19)</i><br><b>TCF3-HLF</b>          | E2A-A          | CACCAGCCTCATGCACAAC           | HLF-1301R      | GGGCCGAGTTCTCCTTCTCCAGGA      | 213+retained<br>intron | TCF3-HLF_FOR_95FF26;           |
| <i>t(9;17)</i><br><b>MPRIP-<br/>JAK2</b>    | JAK2ex7_F      | ACGGTGGAATTCAGTGGTCAA         | MPRIPex21_R    | GCACTGTCAGGGGACTTCTC          | 412                    | MPRIP-<br>JAK2_FOR_93DG07;     |
| <i>t(19;19)</i><br><b>DOT1L-<br/>OAZ1</b>   | OAZ1ex1-F      | CGGATGGTGAAATCCTCCCTG         | DOT1Lex6-R     | TGCTTTCTCGACGCCATAGT          | 513                    | DOT1L-<br>OAZ1_ONE_20ED34;     |
| <i>t(19;19)</i><br><b>TCF3-OAZ1</b>         | OAZ1ex1_F      | CGGATGGTGAAATCCTCCCTG         | TCF3ex6_R      | TCTCCCGAAGGAGGCATAGG          | 343                    | TCF3-<br>OAZ1_FOR_81GA68;      |
| <i>t(3;9)</i><br><b>MBNL1-<br/>PAX5</b>     | PAX5_ex3_F     | ACGCCAAAATCCCAACCATGT         | MBNL1ex4_R     | CACCCGGATTCCCTGTAACC          | 609                    | PAX5-<br>MBNL1_FOR_81FJ29;     |
| <i>t(5;5)</i><br><b>ARHGAP26<br/>-NR3C1</b> | ARHGAP26ex15-F | ACCCCAAGACTGCTTCTGAG          | NR3C1ex2-R     | CCCCGAGGAAAGGCTGATTT          | 611                    | ARHGAP26-<br>NR3C1_FOR_95FF55; |
| <i>t(5;5)</i><br><b>CAMK2A-<br/>CD74</b>    | CD74ex4_F      | TGCAGAATGCCACCAAGTATG         | CAMK2Aex4_R    | TCAGGTAGTGGTGTCCCTCC          | 443                    | CAMK2A-<br>CD74_TWO_52CF51     |
| <i>t(5;5)</i><br><b>PDGFRB-<br/>EBF1</b>    | EBF1e14F2      | CACGAGCATGAACGGATACGGCTC<br>T | PDGFRBe12R1    | ATGGCCGTCAGAGCTCACAGACTC<br>A | 250                    | EBF1-<br>PDGFRB_FOR_95FG05;    |

|                                                    |              |                          |                  |                          |     |                                    |
|----------------------------------------------------|--------------|--------------------------|------------------|--------------------------|-----|------------------------------------|
| <i>t(9;20)</i><br><i>PAX5-</i><br><i>C20orf112</i> | PAX5_ex3 F   | ACGCCAAAATCCCACCATGT     | C20orf112_ex11 R | TGAGGTTTTCCAGTTCATCTGC   | 500 | PAX5-<br>C20ORF112_FOR_81FJ76<br>; |
| <i>t(9;9)</i><br><i>NUP214-</i><br><i>ABL1</i>     | NUP214ex25_F | CTACTCCACAGCCAAAACACCTCA | ABL1e4_R         | GCCACCGTCAGGCTGTATTCTTCC | 696 | NUP214-<br>ABL1_FOR_98EF26;        |
| <i>t(9;9) PAX5-</i><br><i>JAK2</i>                 | PAX5_ex3 F   | ACGCCAAAATCCCACCATGT     | JAK2_ex20 R      | AGCACTGTAGCACACTCCCT     | 622 | PAX5-<br>JAK2_FOR_81FI58-M;        |



Supplementary Table 3: Samples features, such as age, sex, immunophenotype, and minimal residual diseases (MRD) according to BFM protocol (Conter et al, Blood, 2010). MRD values: SR is negative at day +33 and +78 with marker sensitivity of  $1 \times 10^{-4}$ ; HR is positive to mrd  $\geq 5 \times 10^{-4}$  at day +78; SER positive to mrd  $\geq 5 \times 10^{-4}$  at both day+33 and day+78; MR positive to mrd  $\leq 5 \times 10^{-4}$  at both day+33 and day+78.

| <i>Sample</i> | <i>Age</i> | <i>Sex</i> | <i>Immunophenotype</i> | <i>MRD</i> | <i>Sample</i> | <i>Age</i> | <i>Sex</i> | <i>Immunophenotype</i> | <i>MRD</i> |
|---------------|------------|------------|------------------------|------------|---------------|------------|------------|------------------------|------------|
| HR1           | 10         | M          | BII                    | HR         | PT34          | 13         |            | BII                    | HR         |
| HR10          | 5          | F          | BIII                   | HR         | PT35          | 4          | M          | BII                    | SER        |
| HR11          | 16         | M          | BII                    | HR         | PT36          | 15         | M          | BII                    | SER        |
| HR12          | 6          | F          | BII                    | SER        | PT37          | 5          | M          | BII                    | MR         |
| HR13          | 18         | F          | BII                    | HR         | PT38          | 4          | F          | BIII                   | MR         |
| HR15          | 8          | M          | BII                    | HR         | PT4           | NA         | M          | NA                     | NA         |
| HR16          | 5          | F          | BII                    | SER        | PT40          | 5          | F          | BII                    | MR         |
| HR2           | 10         | F          | BII                    | HR         | PT41          | 10         | M          | BII                    | MR         |
| HR3           | 16         | F          | BII                    | HR         | PT42          | 12         | M          | BII                    | MR         |
| HR4           | NA         | M          | NA                     | NA         | PT43          | 14         | F          | BII                    | MR         |
| HR5           | 14         | M          | BII                    | SER        | PT44          | NA         | M          | NA                     | NA         |
| HR6           | 18         | M          | BII                    | NA         | PT45          | 4          | M          | BII                    | SER        |
| HR7           | 16         | M          | BIII                   | HR         | PT46          | 5          | F          | BII                    | SER        |
| HR8           | 5          | M          | BIII                   | MR         | PT47          | 7          | M          | BII                    | HR         |
| HR9           | 14         | F          | BII                    | HR         | PT48          | 7          | F          | BIII                   | SER        |
| PT1           | 13         | M          | BIII                   | MR         | PT49          | 10         | F          | BIII                   | MR         |
| PT10          | 11         | F          | BII                    | HR         | PT5           | 4          | M          | BII                    | HR         |
| PT11          | 14         | M          | BII                    | SER        | PT6           | 4          | M          | BII                    | NA         |
| PT12          | 10         | M          | BII                    | HR         | PT7           | 6          | M          | BII                    | HR         |
| PT13          | 5          | F          | BIII                   | MR         | PT8           | 11         | F          | BII                    | MR         |
| PT14          | 5          | F          | BII                    | MR         | PT9           | 7          | F          | BII                    | SER        |
| PT15          | 7          | F          | BII                    | SER        | RL1           | 10         | M          | BI                     | SR         |
| PT16          | 5          | F          | BIII                   | SER        | RL10          | 18         | M          | NA                     | NA         |
| PT17          | 16         | M          | BII                    | SER        | RL11          | 5          | M          | BII                    | SER        |
| PT18          | 16         | M          | BII                    | SER        | RL12          | 14         | M          | BII                    | SER        |
| PT19          | 14         | M          | BII                    | HR         | RL13          | 12         | F          | BIII                   | MR         |
| PT2           | 14         | F          | BII                    | SER        | RL14          | 14         | F          | BII                    | NO HR      |
| PT20          | 14         | F          | BIII                   | MR         | RL16          | 6          | M          | BII                    | MR         |

|             |    |   |      |     |             |    |    |    |     |    |
|-------------|----|---|------|-----|-------------|----|----|----|-----|----|
| <i>PT21</i> | 5  | M | BII  | HR  | <i>RL17</i> | NA | F  | NA | NA  |    |
| <i>PT22</i> | 6  | M | BII  | SER | <i>RL18</i> |    | 10 | F  | BII | MR |
| <i>PT23</i> | 6  | M | BIII | SER | <i>RL19</i> |    | 10 | M  | BII | HR |
| <i>PT24</i> | 5  | F | BIII | SER | <i>RL2</i>  |    | 13 | M  | BII | MR |
| <i>PT25</i> | 5  | F | BII  | MR  | <i>RL21</i> |    | 18 | M  | B   | MR |
| <i>PT26</i> | 11 | F | BII  | SER | <i>RL22</i> |    | 14 | M  | BII | MR |
| <i>PT27</i> | 8  | M | BII  | MR  | <i>RL23</i> | NA |    | F  | NA  | NA |
| <i>PT28</i> | 5  | F | BII  | NA  | <i>RL24</i> |    | 6  | F  | NA  | NA |
| <i>PT29</i> | 11 | F | BII  | HR  | <i>RL25</i> |    | 13 | F  | BII | MR |
| <i>PT3</i>  | 7  | M | BII  | HR  | <i>RL3</i>  |    | 18 | F  | BII | MR |
| <i>PT30</i> | NA | M | BII  | MR  | <i>RL5</i>  |    | 13 | F  | BII | MR |
| <i>PT31</i> | 14 | M | BIII | SER | <i>RL6</i>  |    | 14 | M  | BII | SR |
| <i>PT32</i> | 7  | M | BIII | HR  | <i>RL7</i>  |    | 18 | M  | BII | HR |
| <i>PT33</i> | 13 | M | BIII | NA  | <i>RL8</i>  | NA |    | M  | NA  | NA |
|             |    |   |      |     | <i>RL9</i>  |    | 5  | M  | BII | SR |

Supplementary Figure 1: a) Fluorescence *in-situ* validation of the rearrangement between chromosome 2q22.3 and chromosome 9p24.1 causing the expressed fusion gene *ZEB2-JAK2*. B) Fluorescence *in-situ* validation of the rearrangement between chromosome 9p24.1 and chromosome 17q11.2 causing the expressed fusion gene *JAK2-MPRIP*.

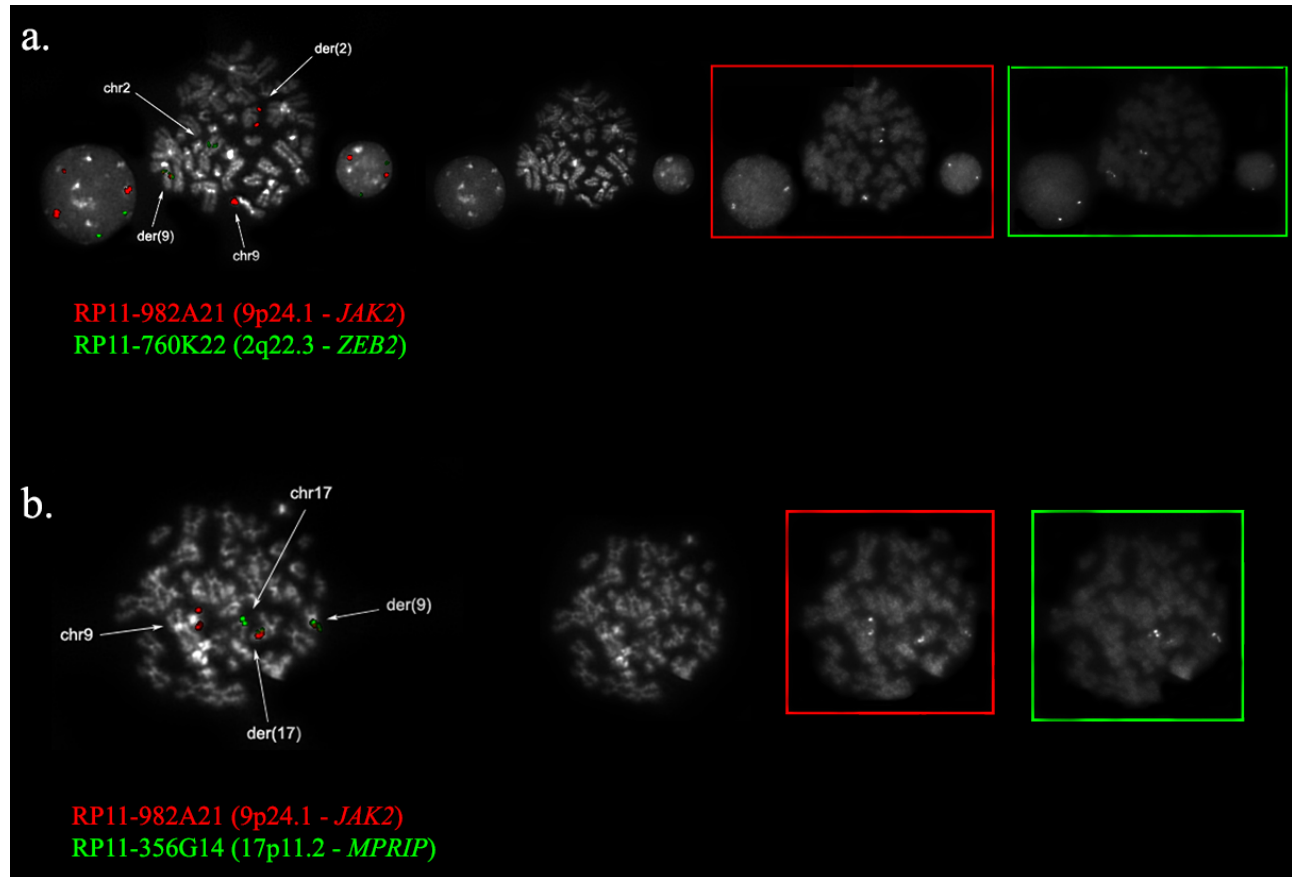

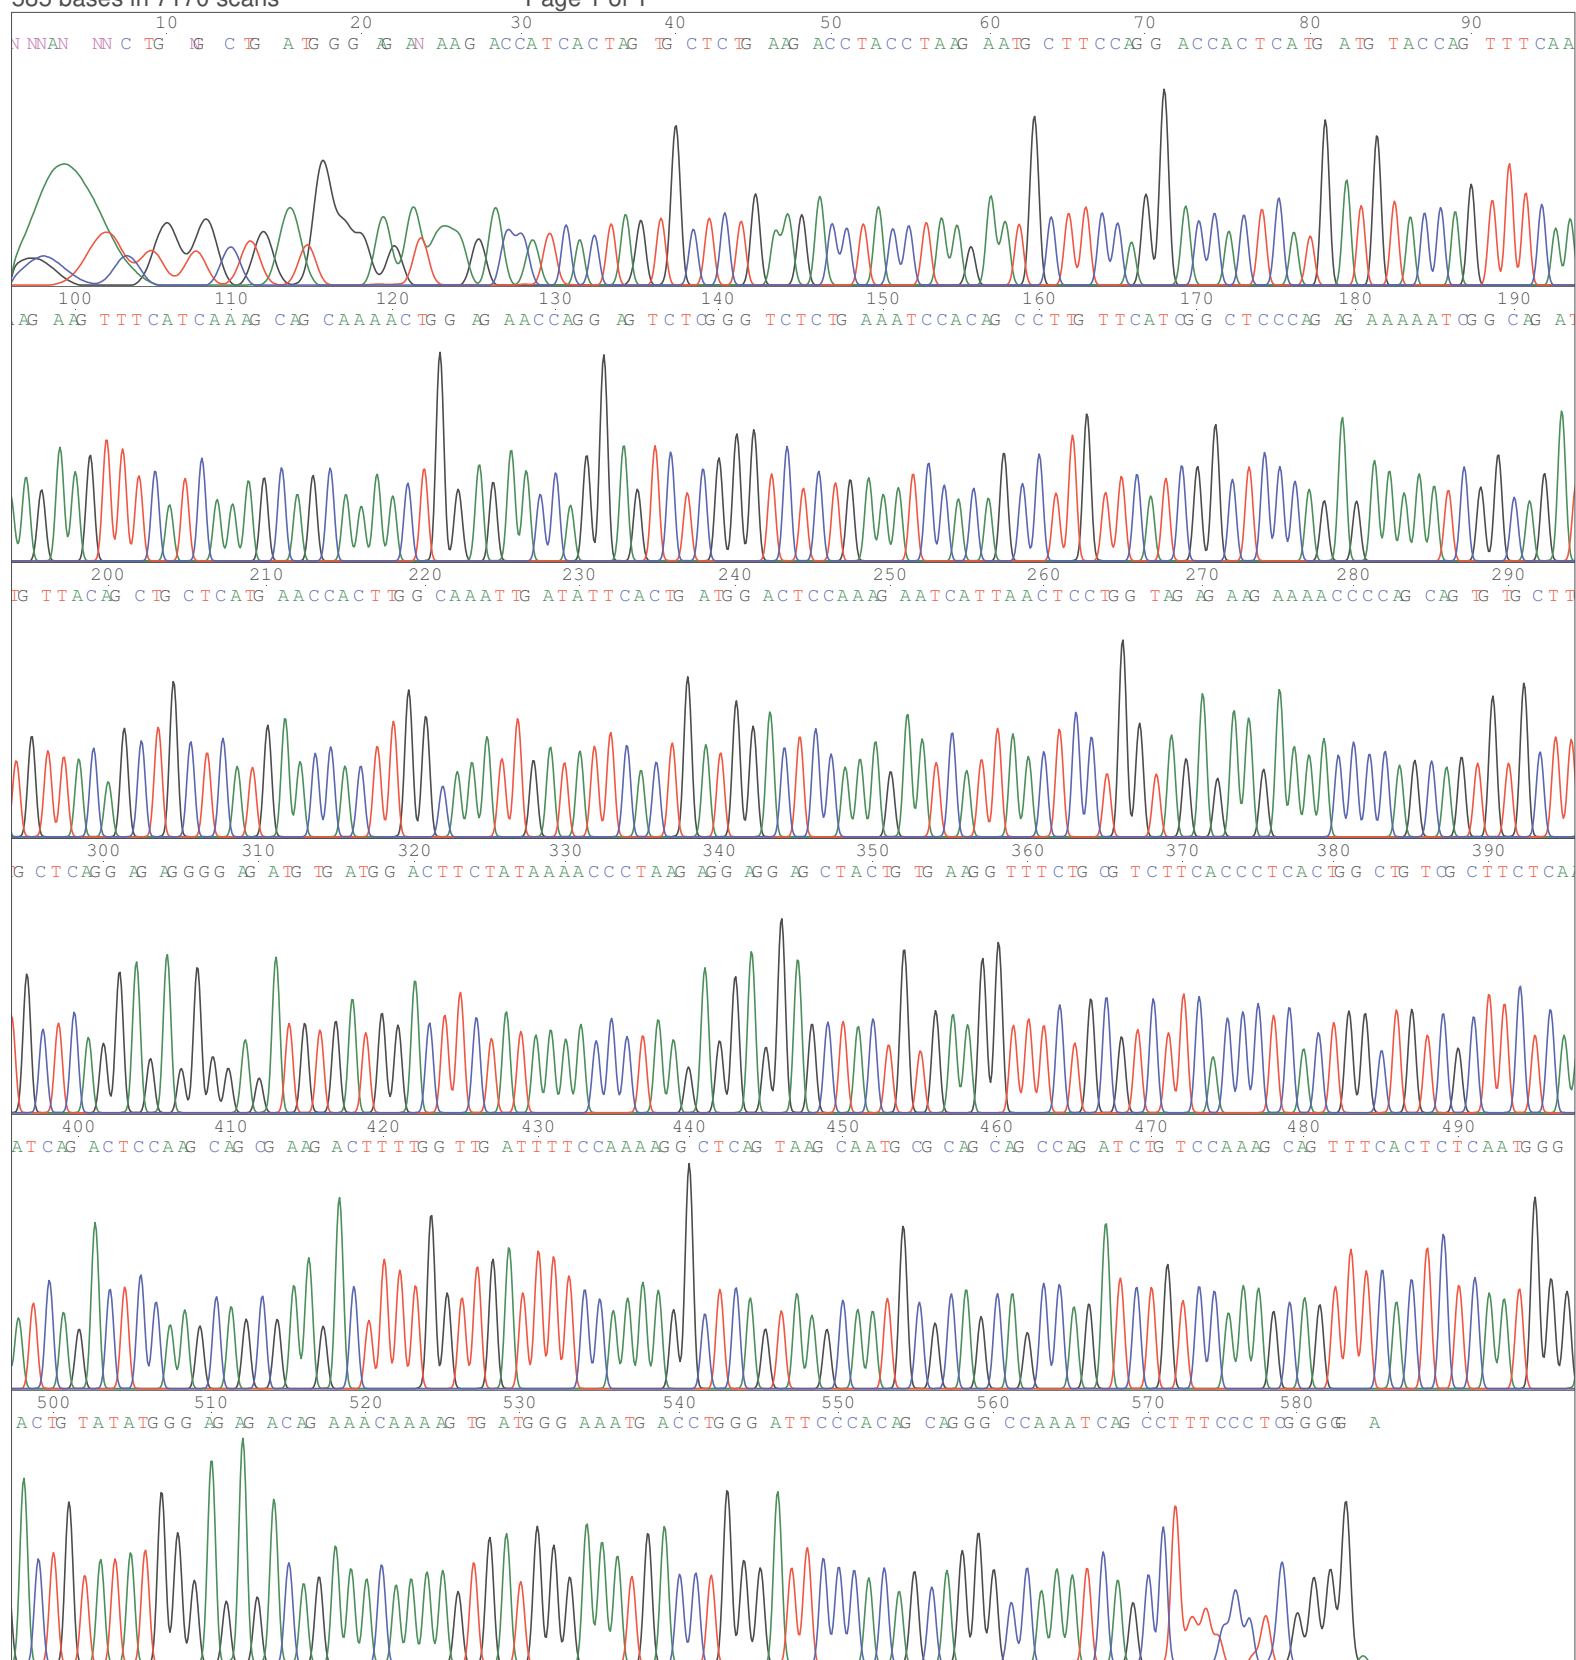

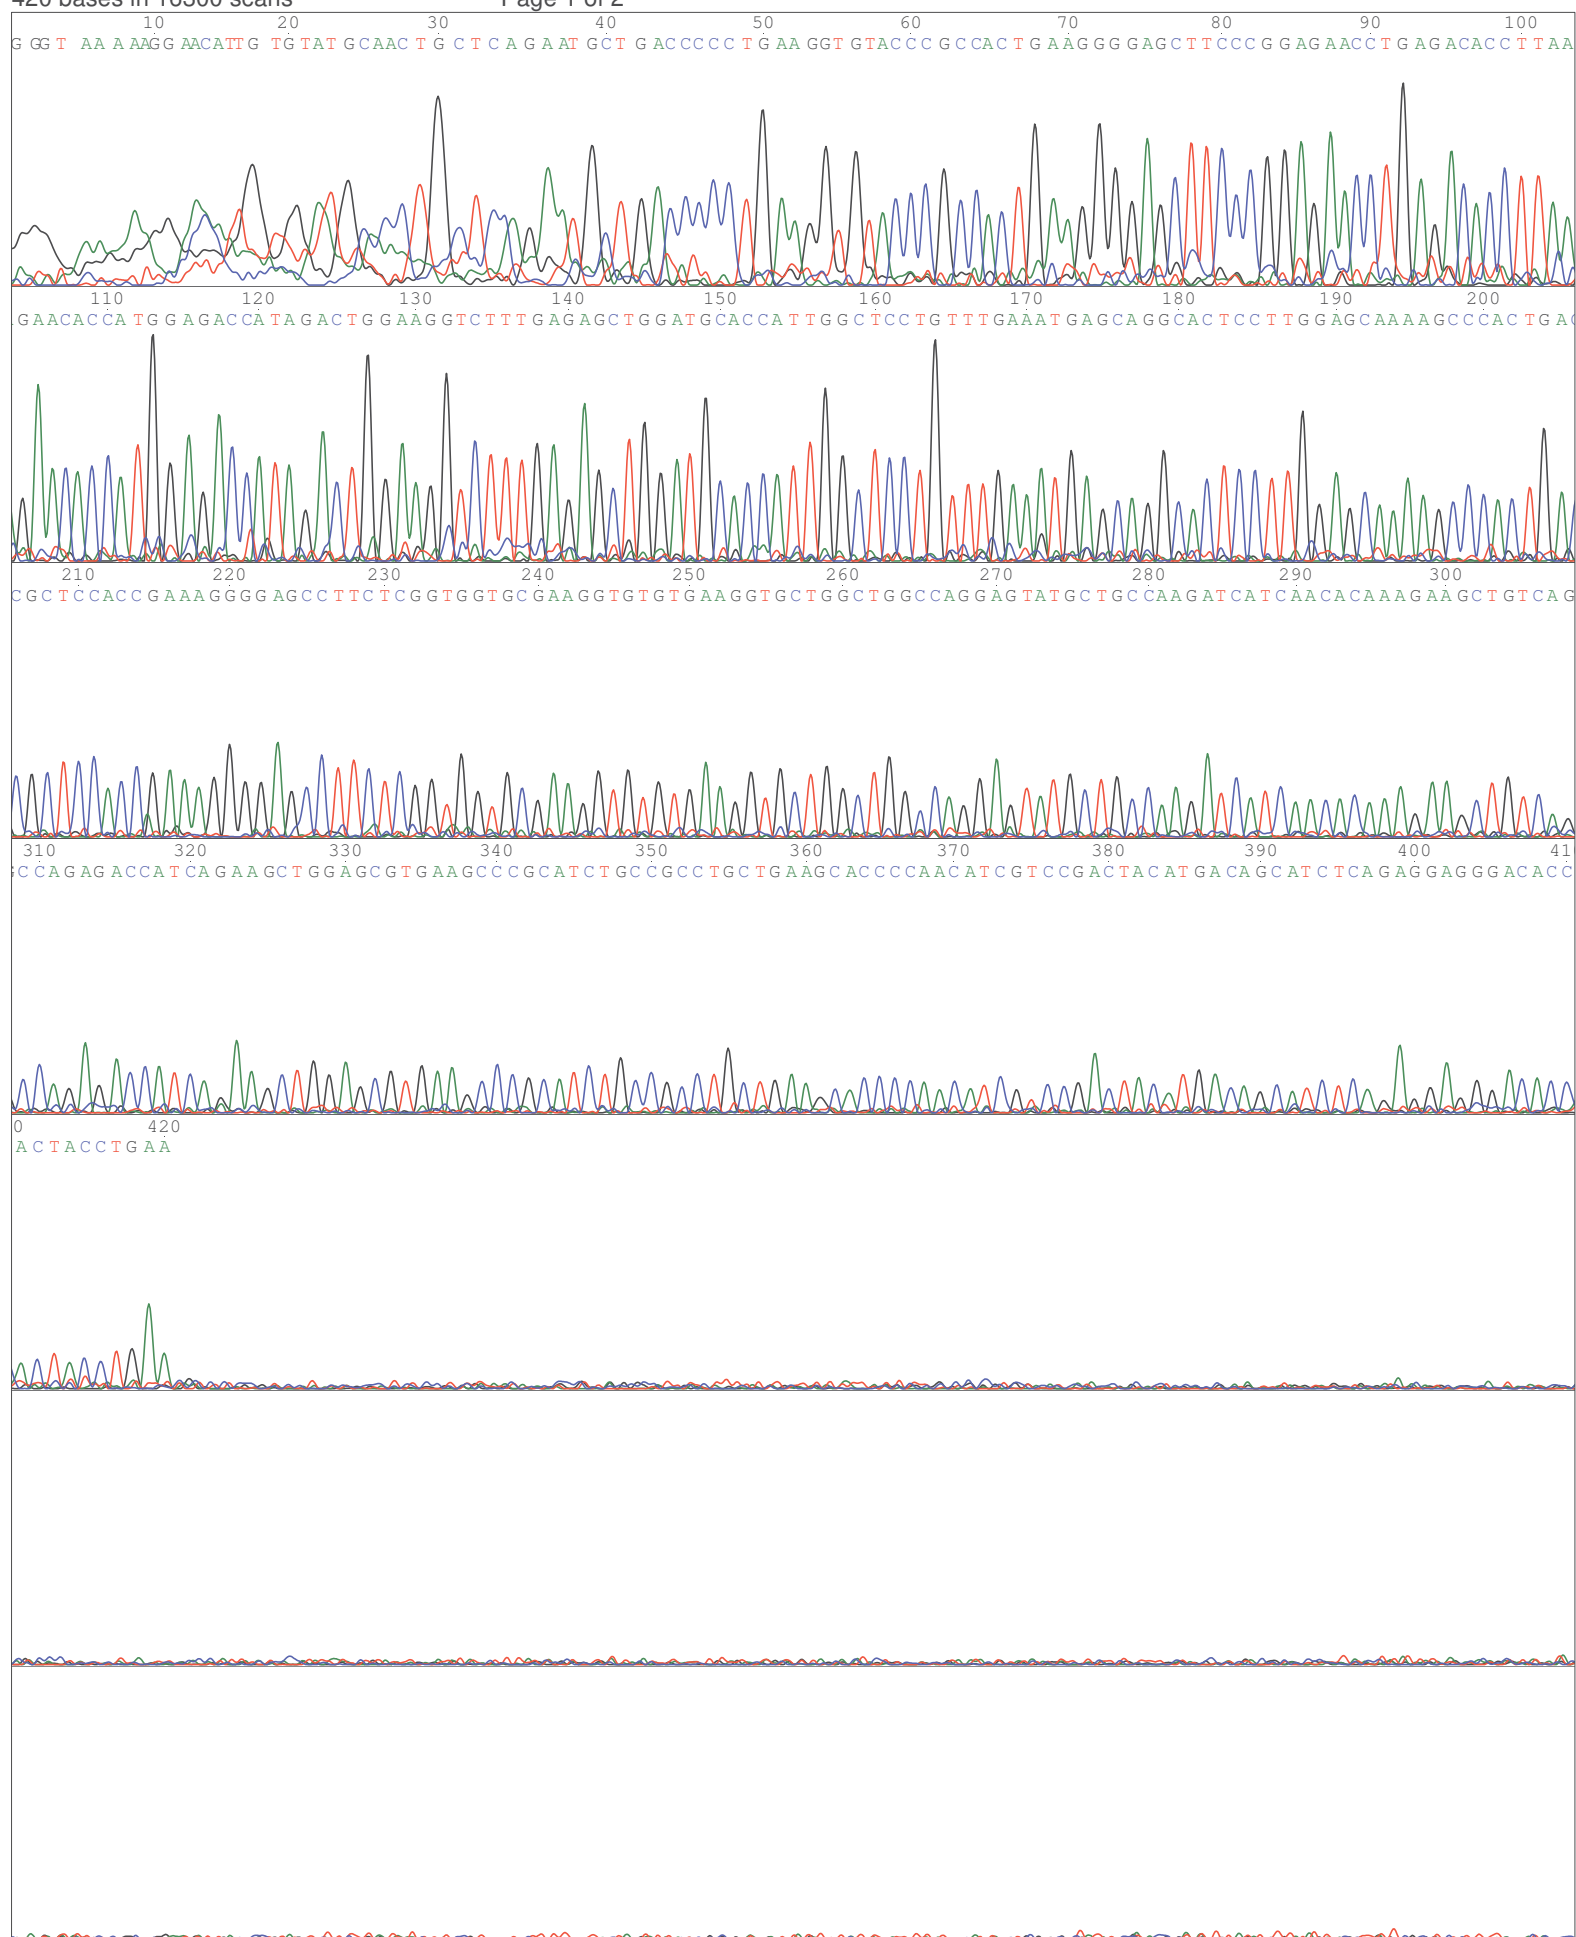

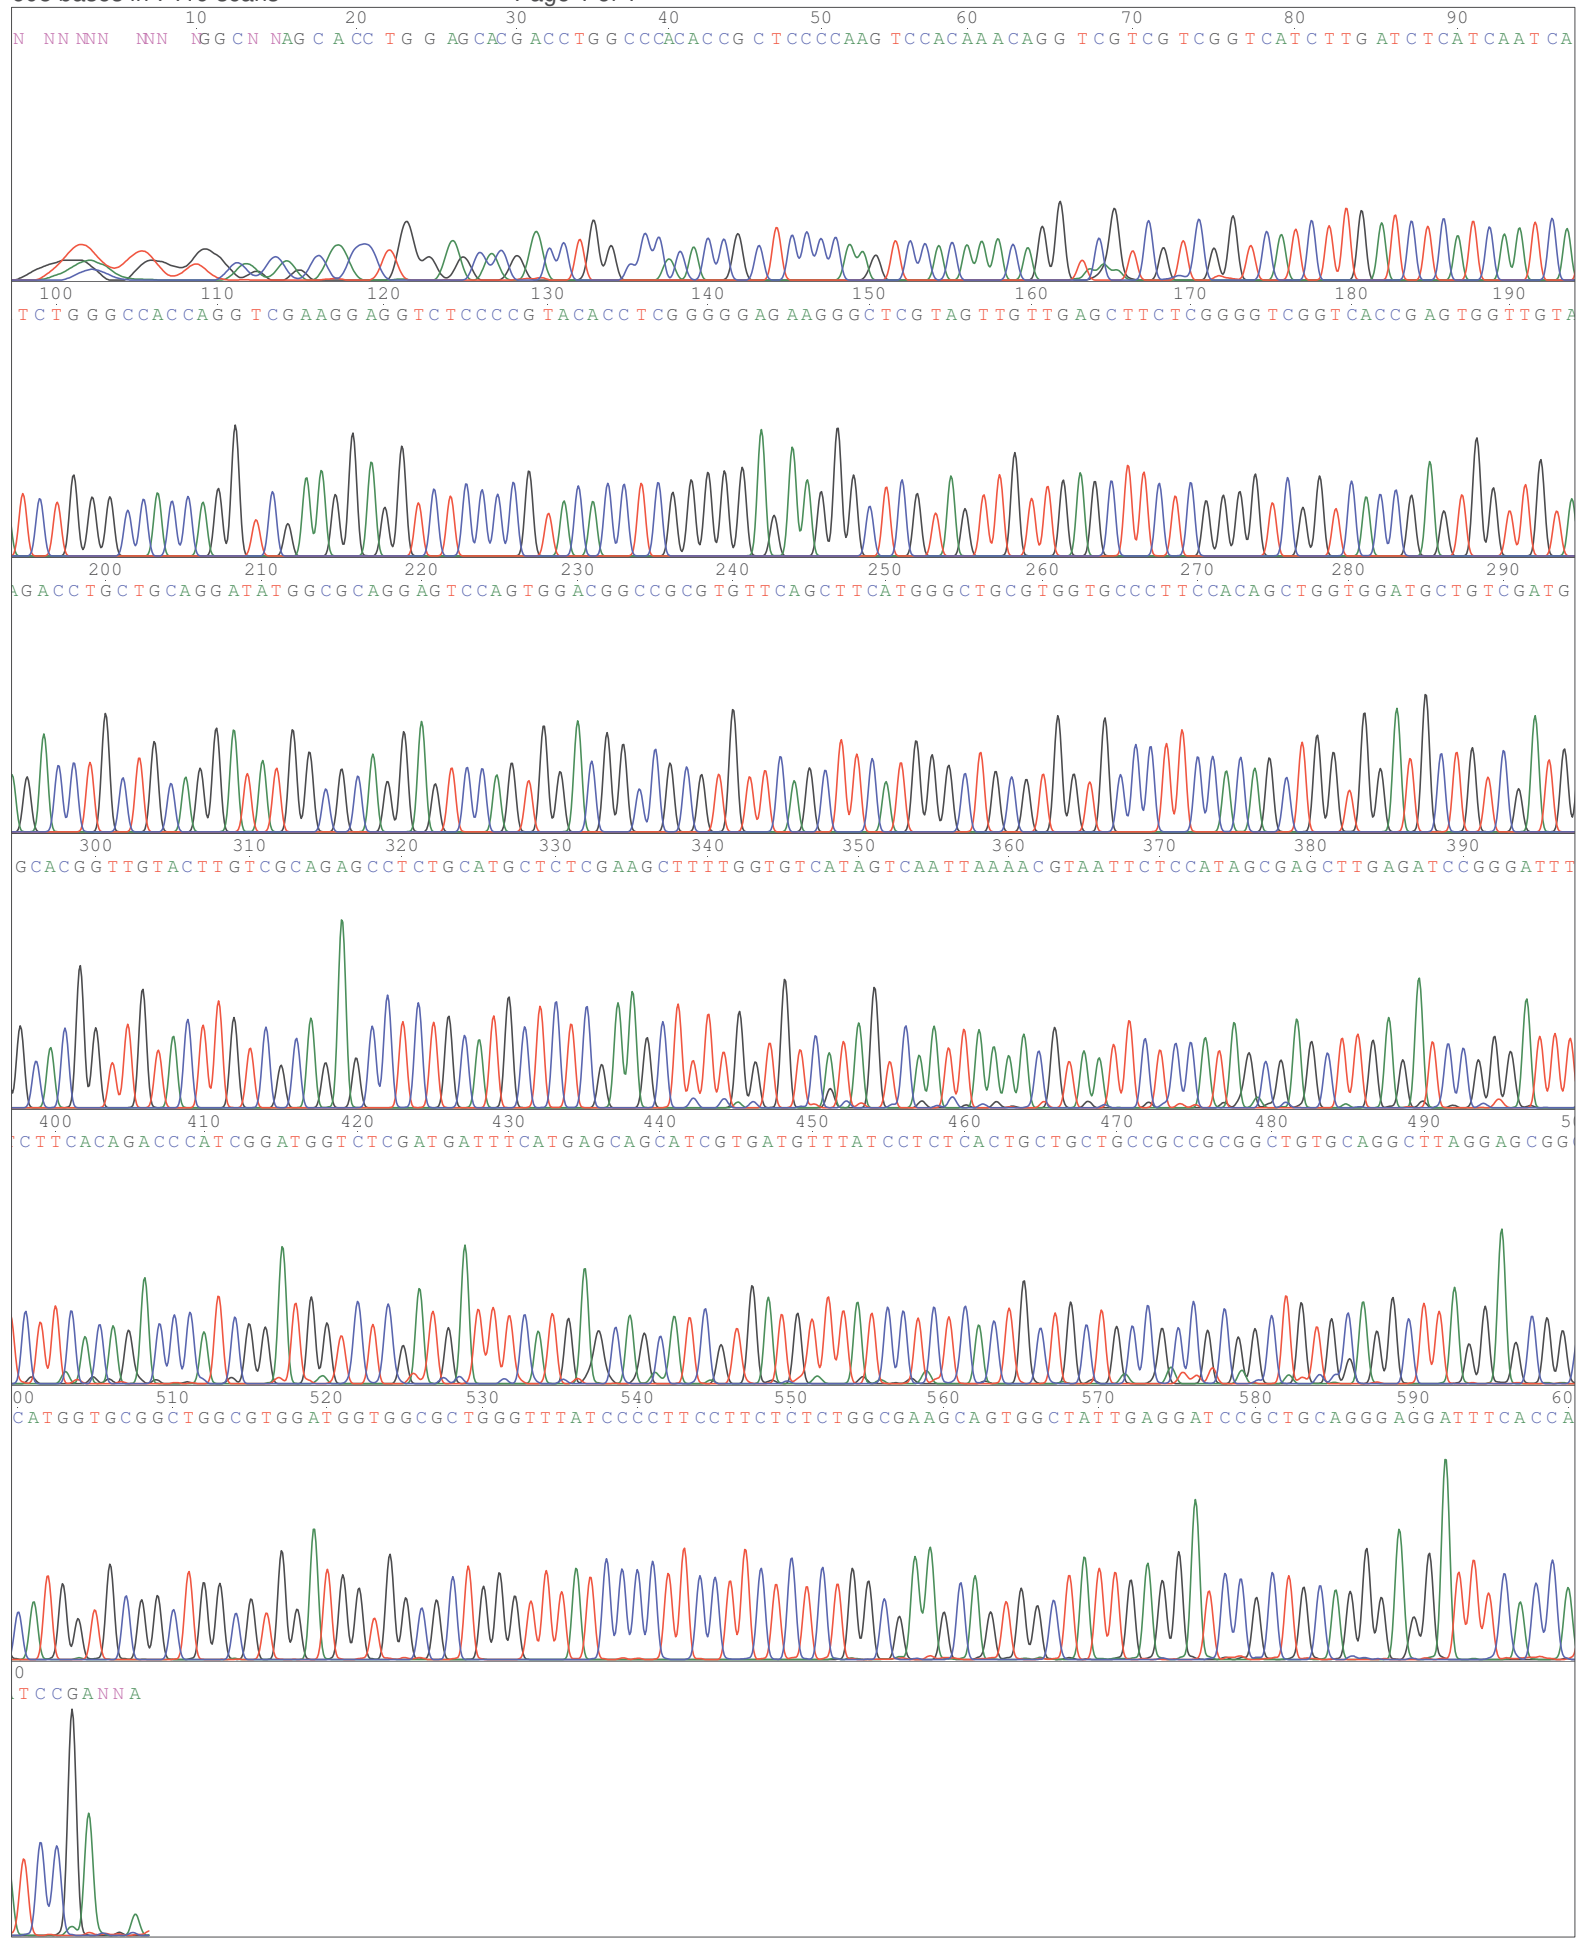

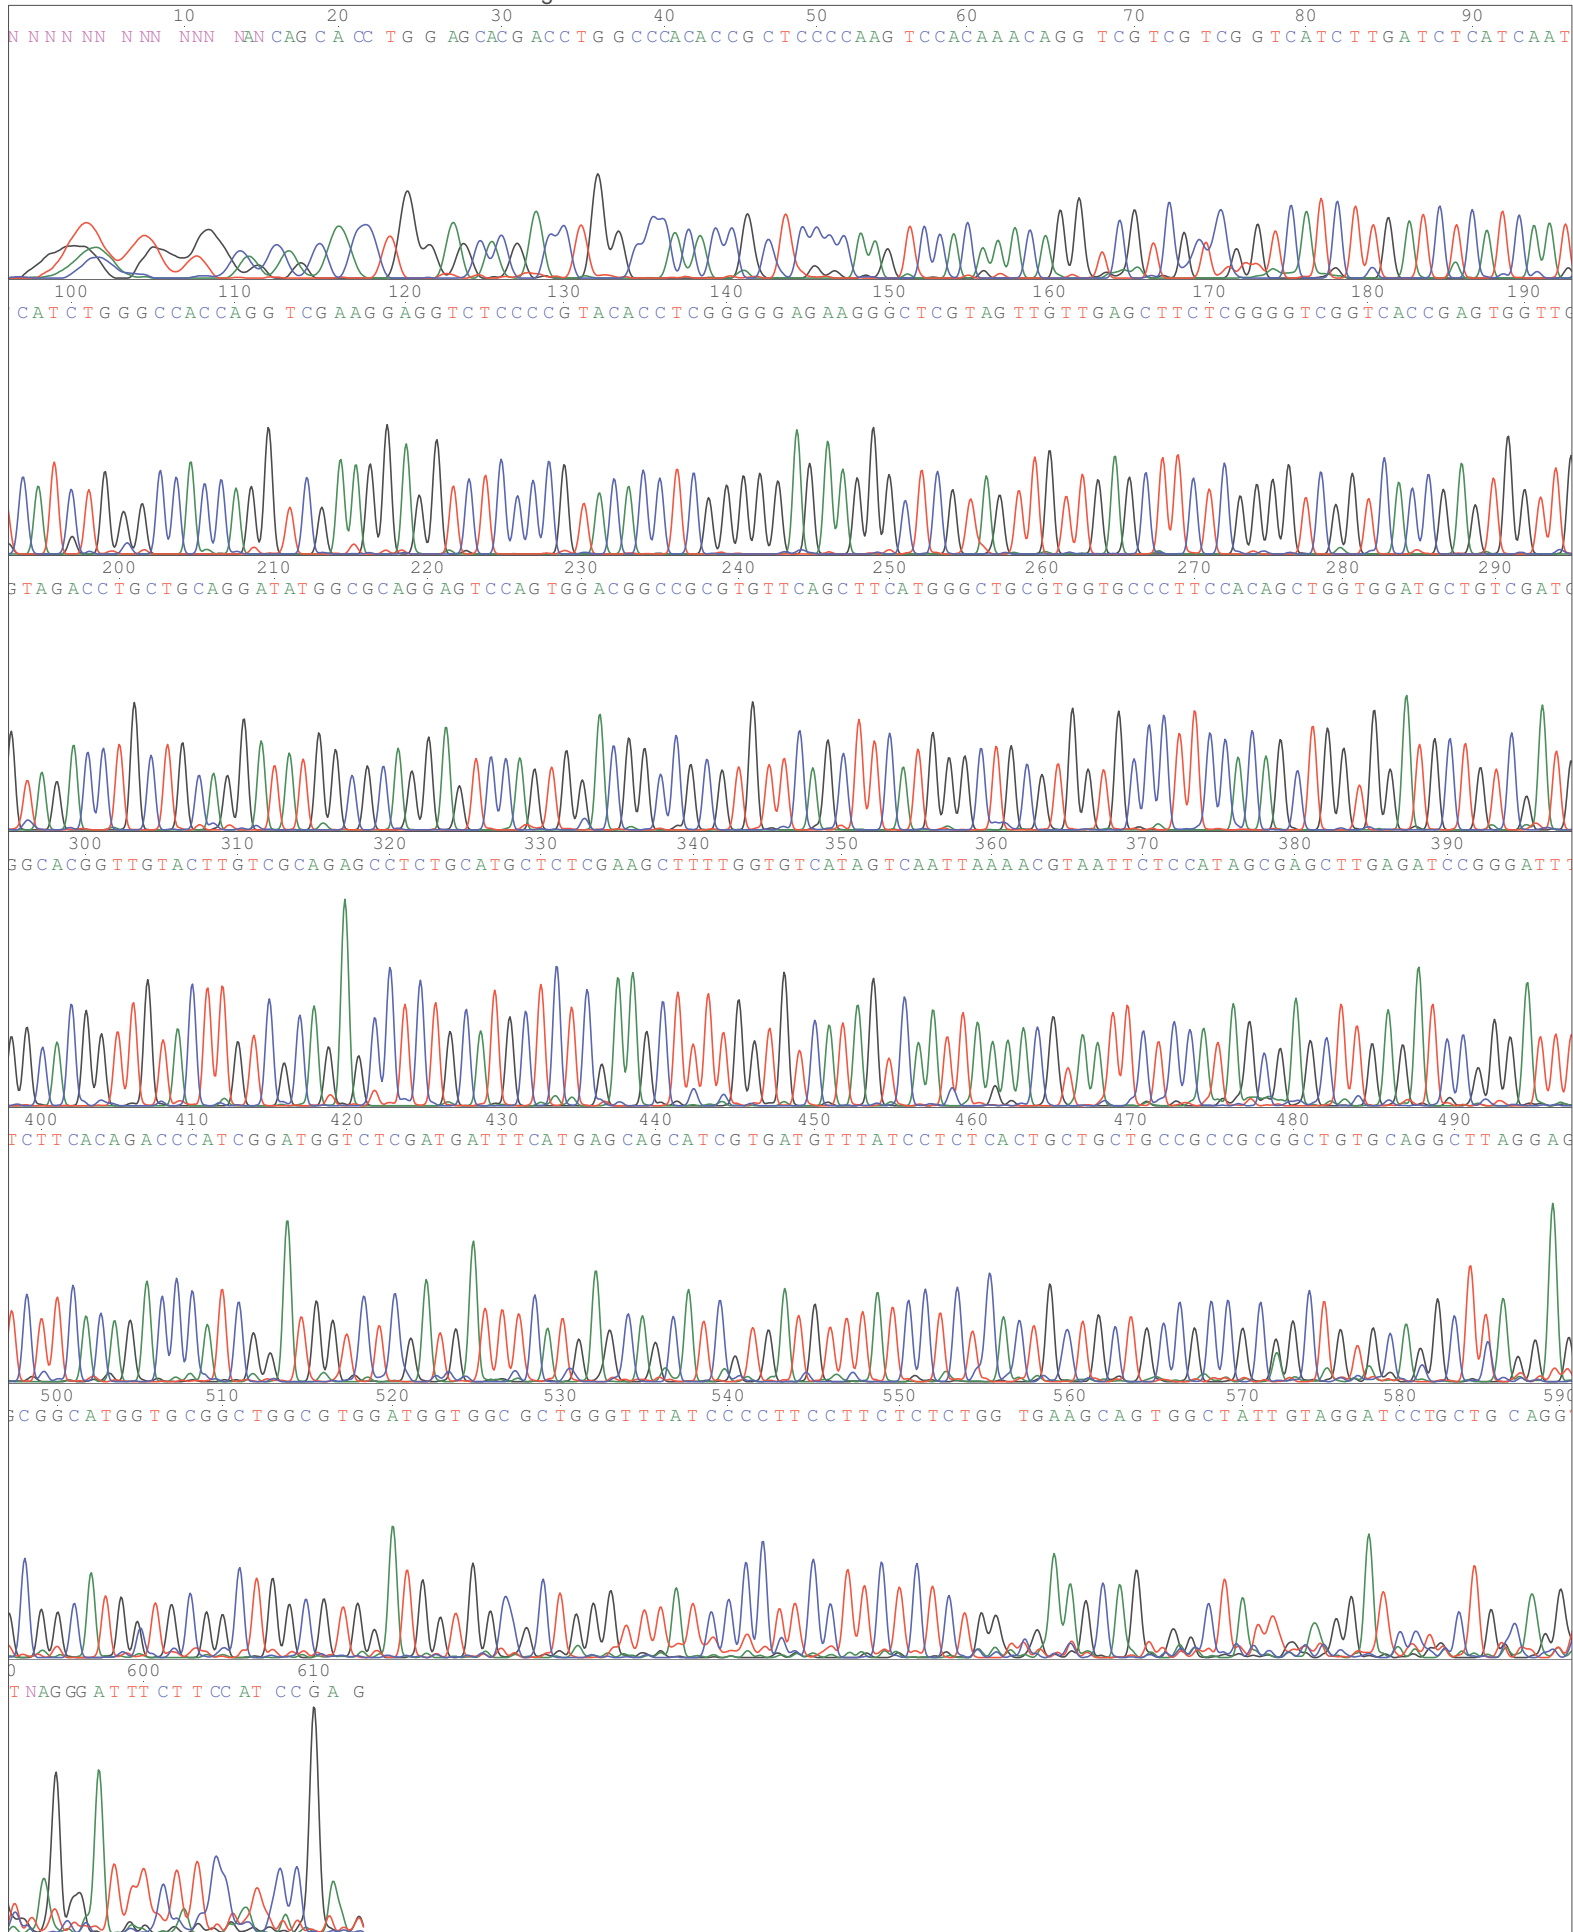

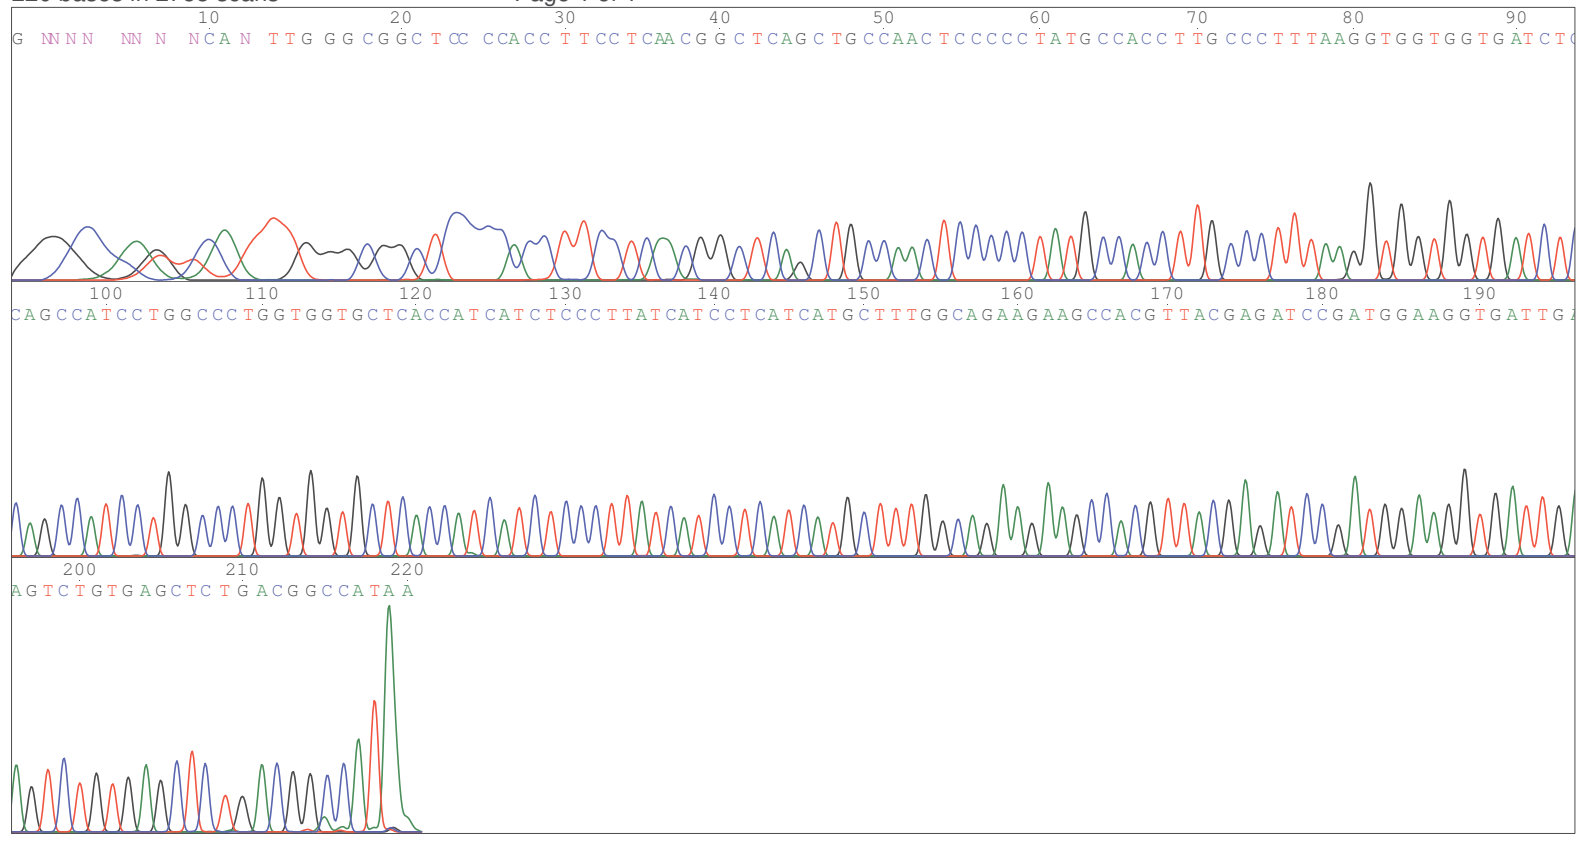



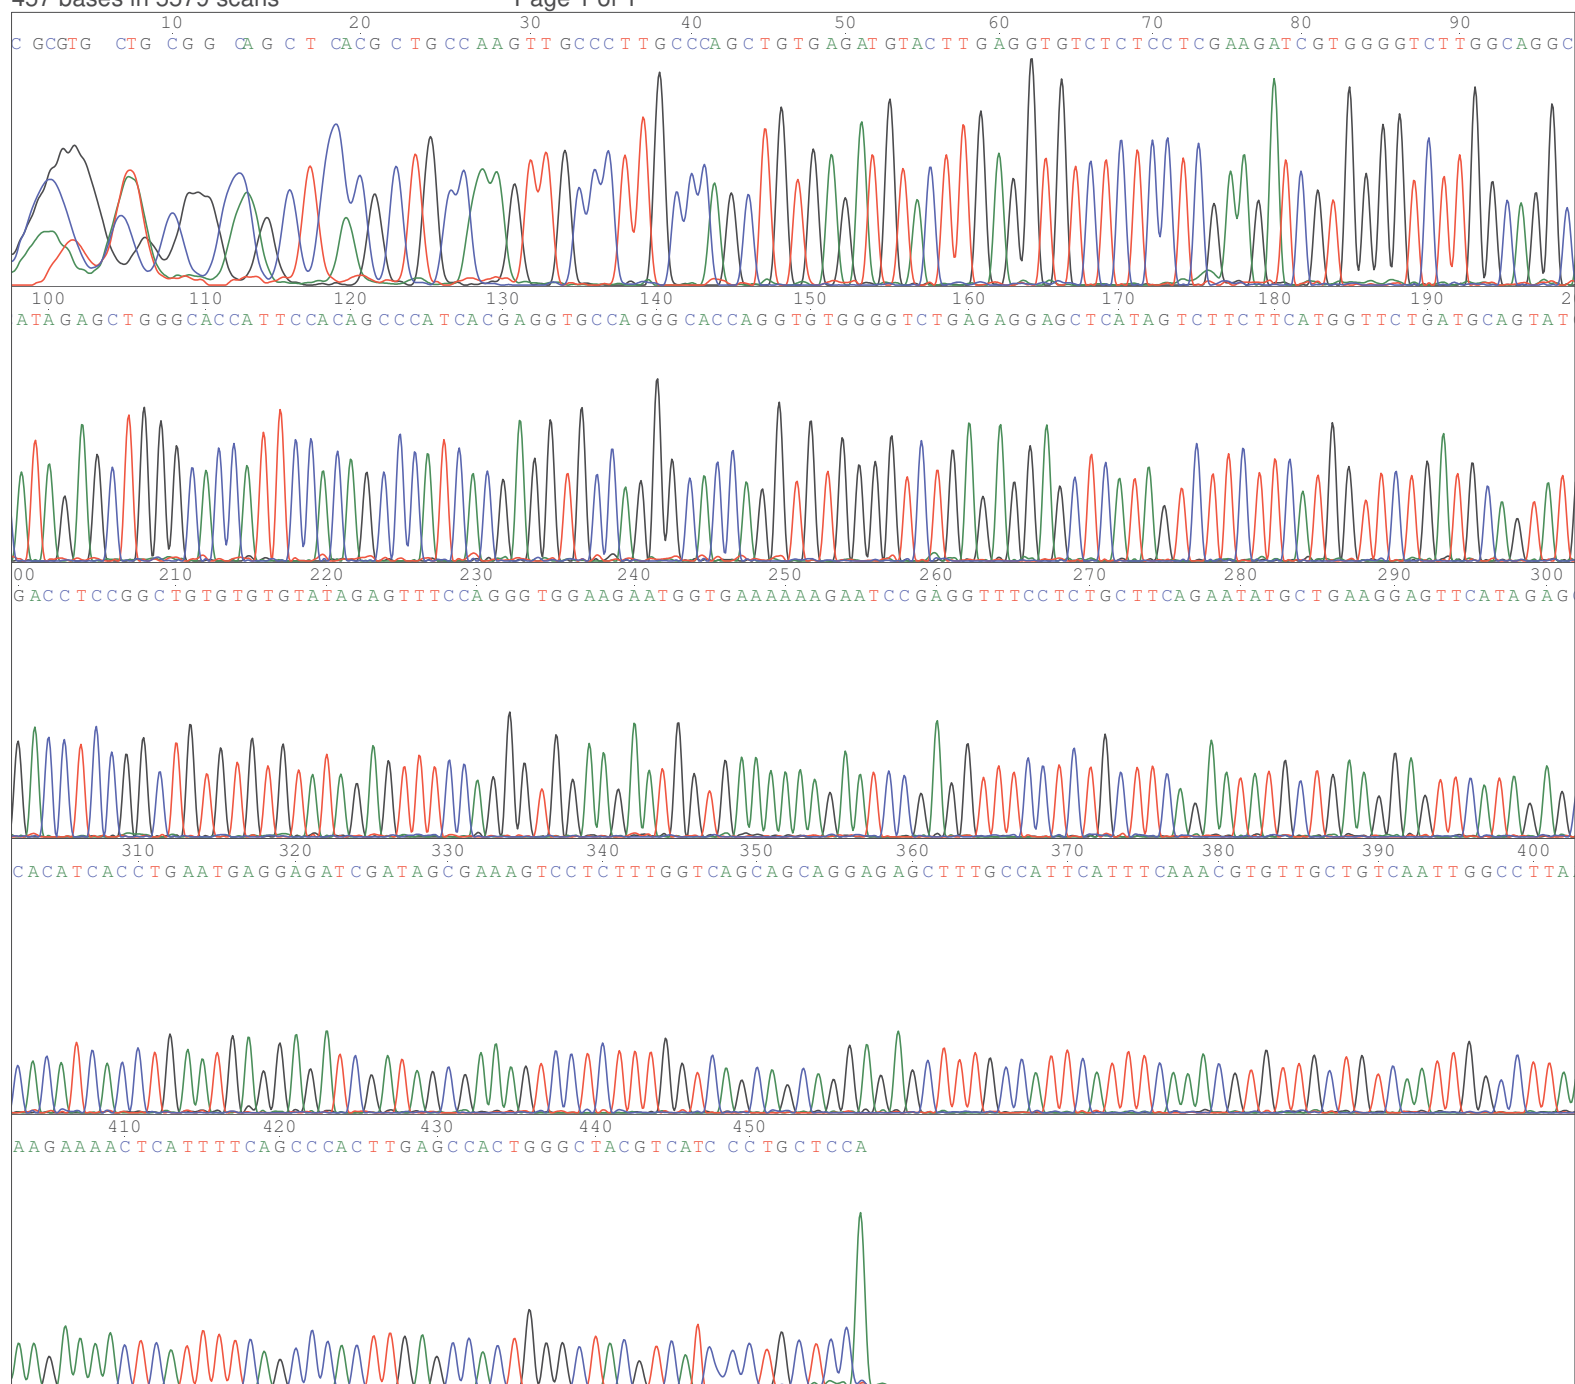

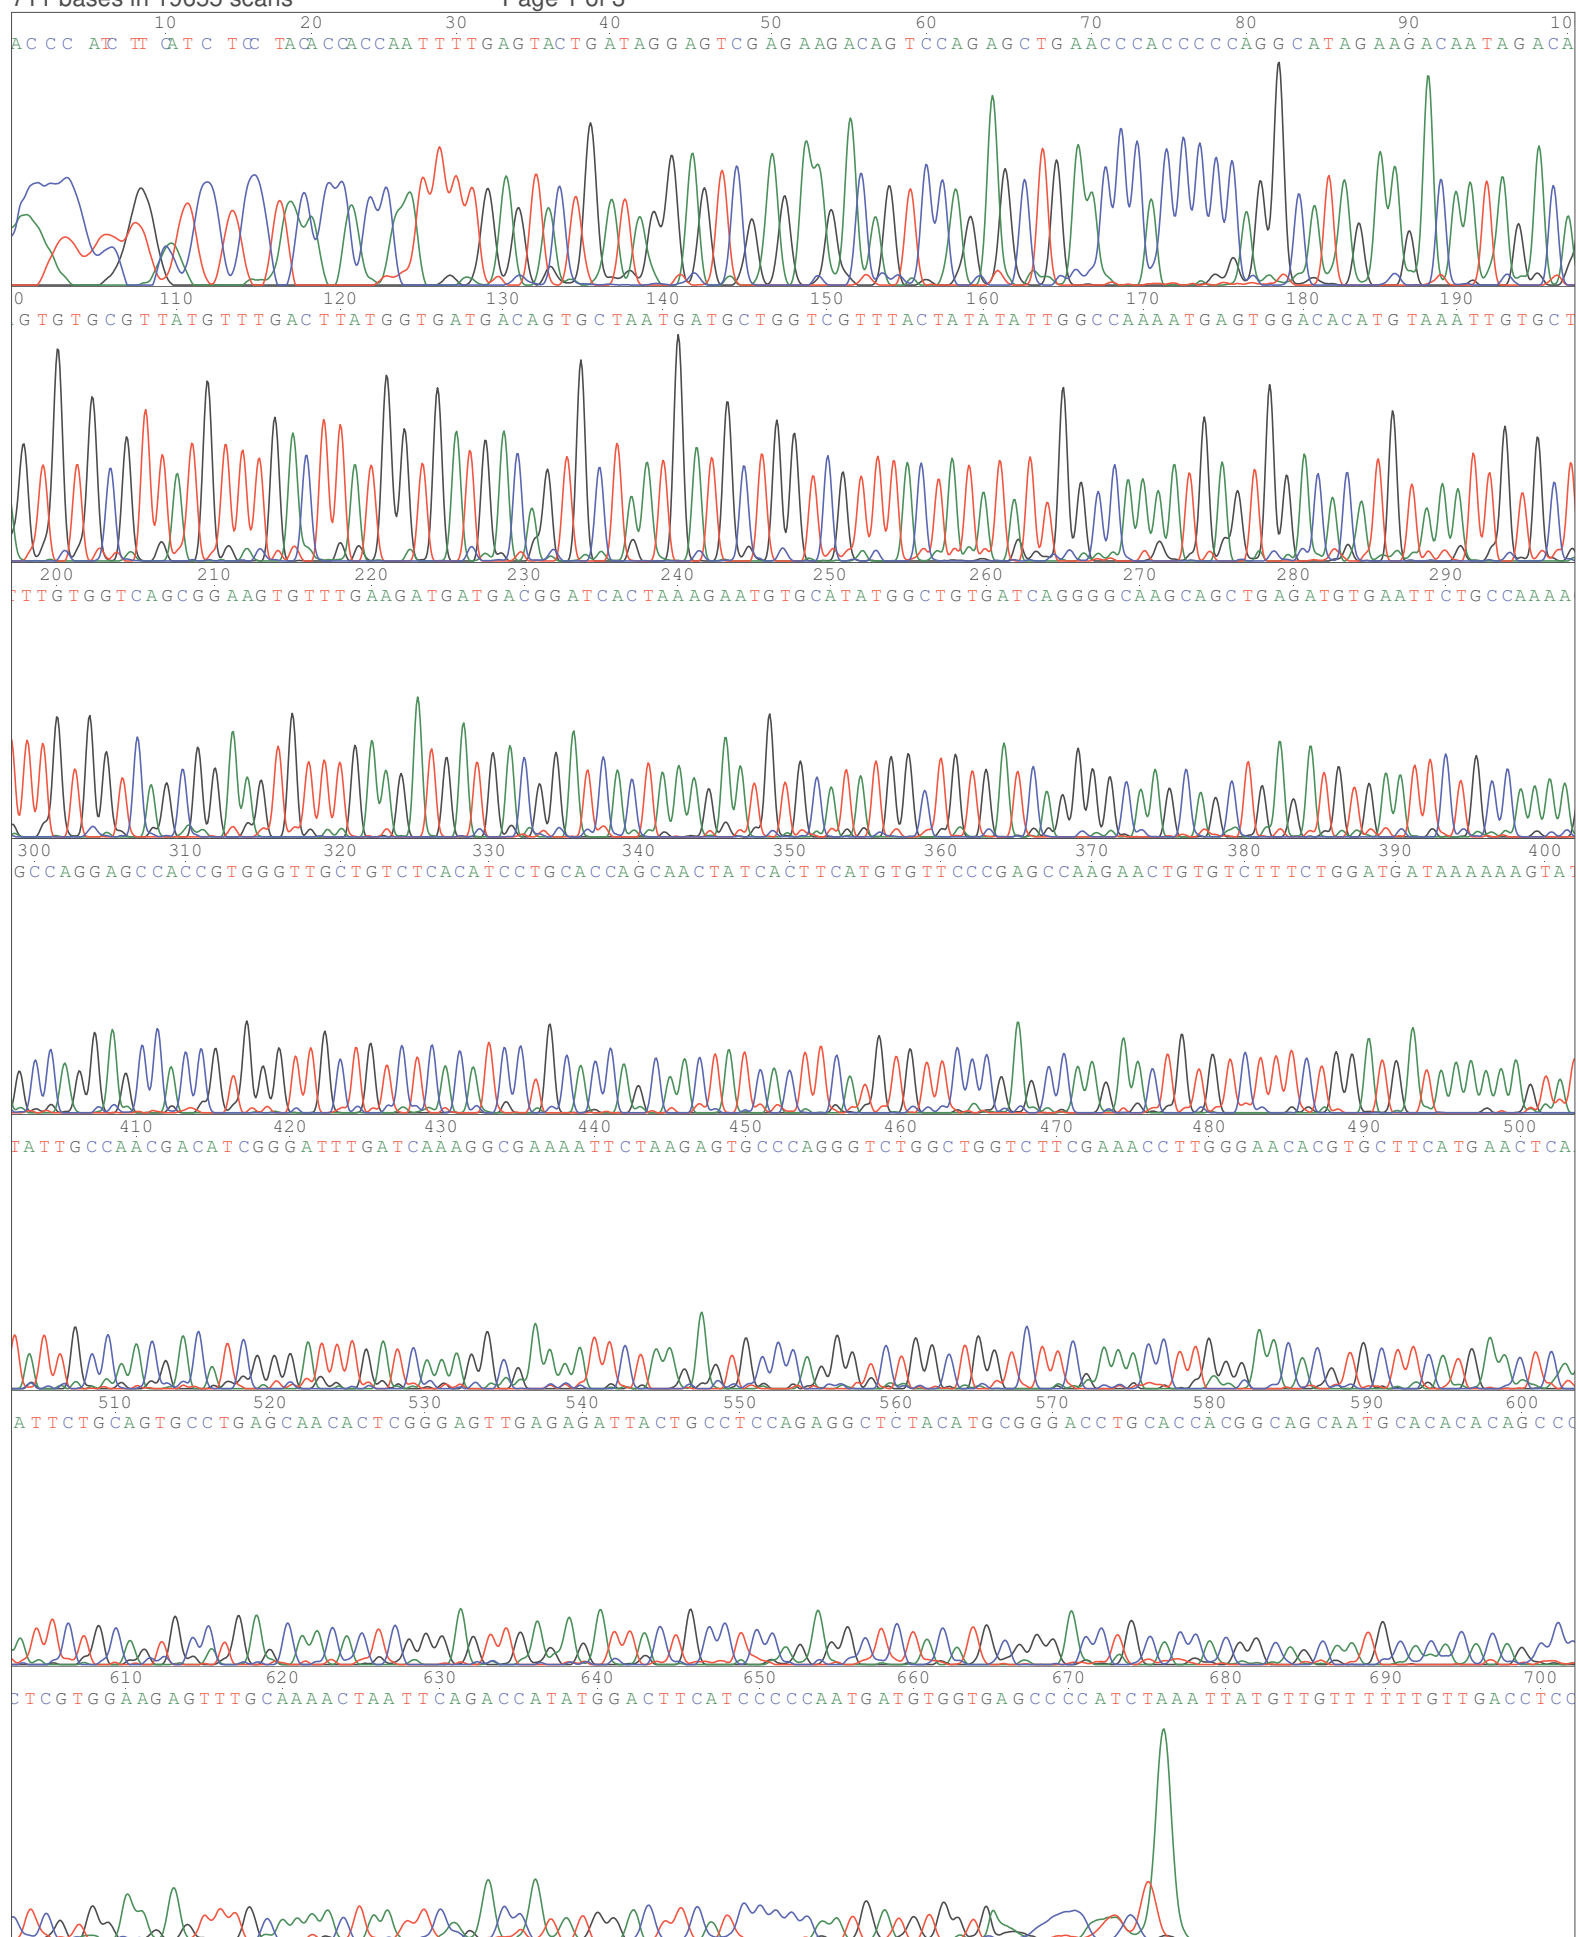

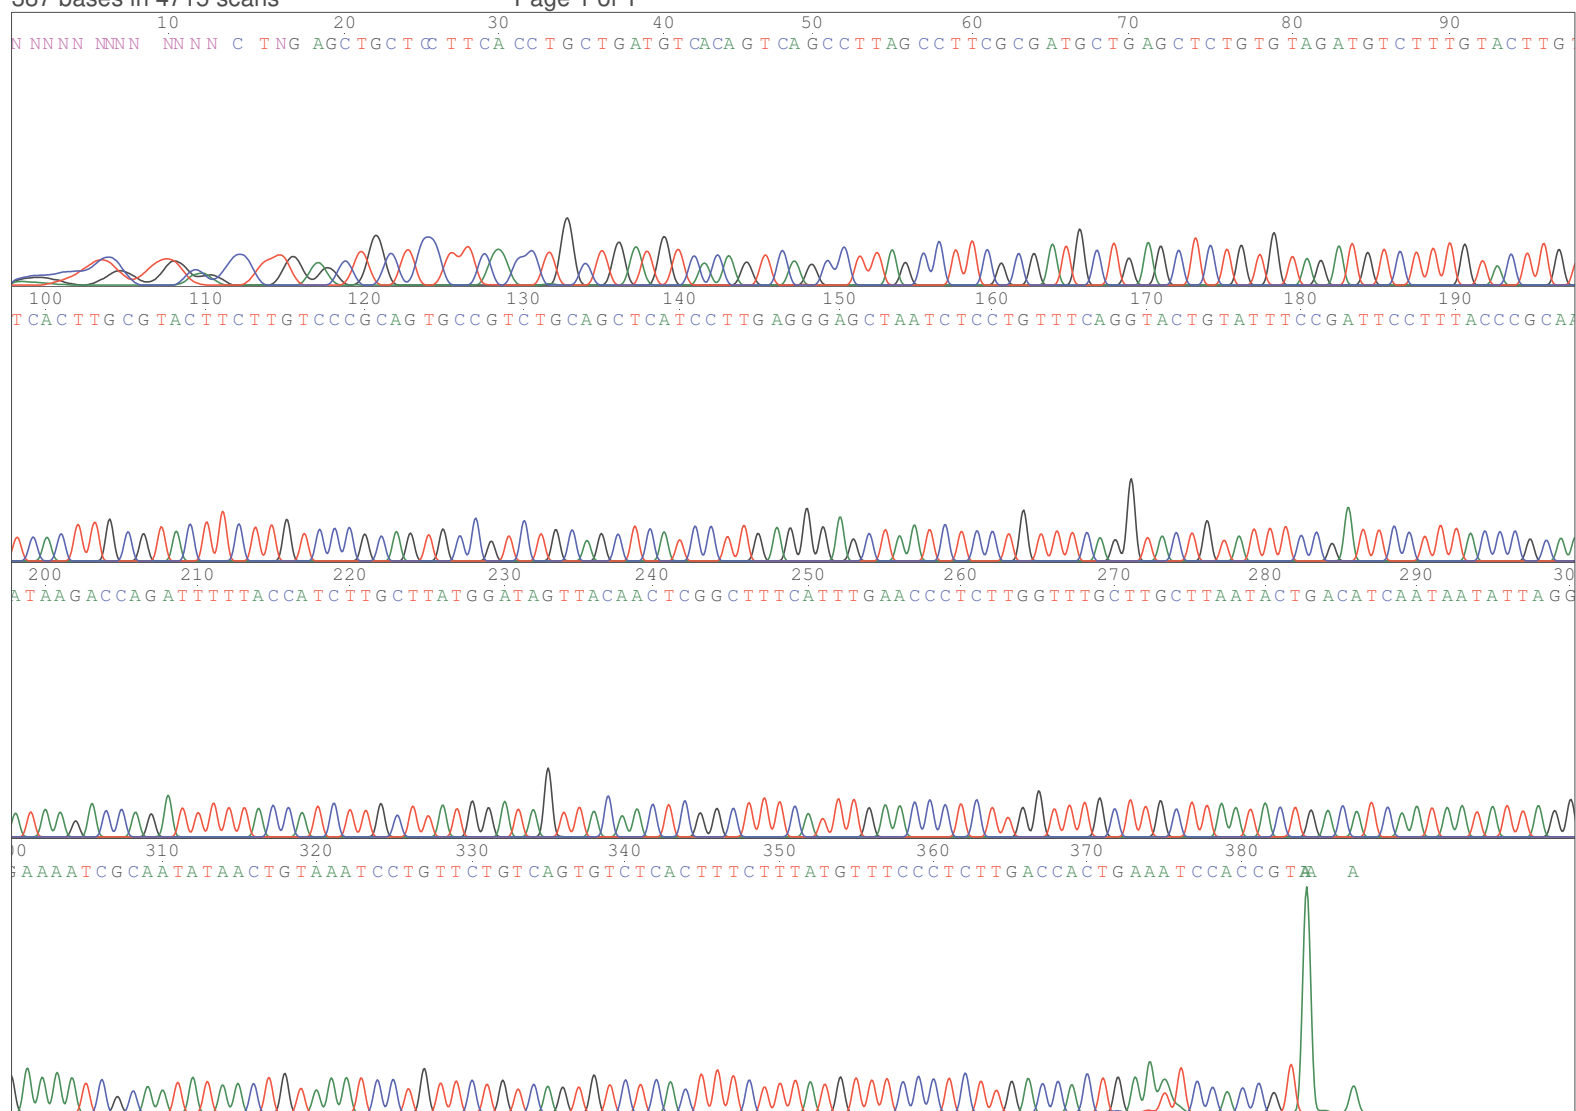

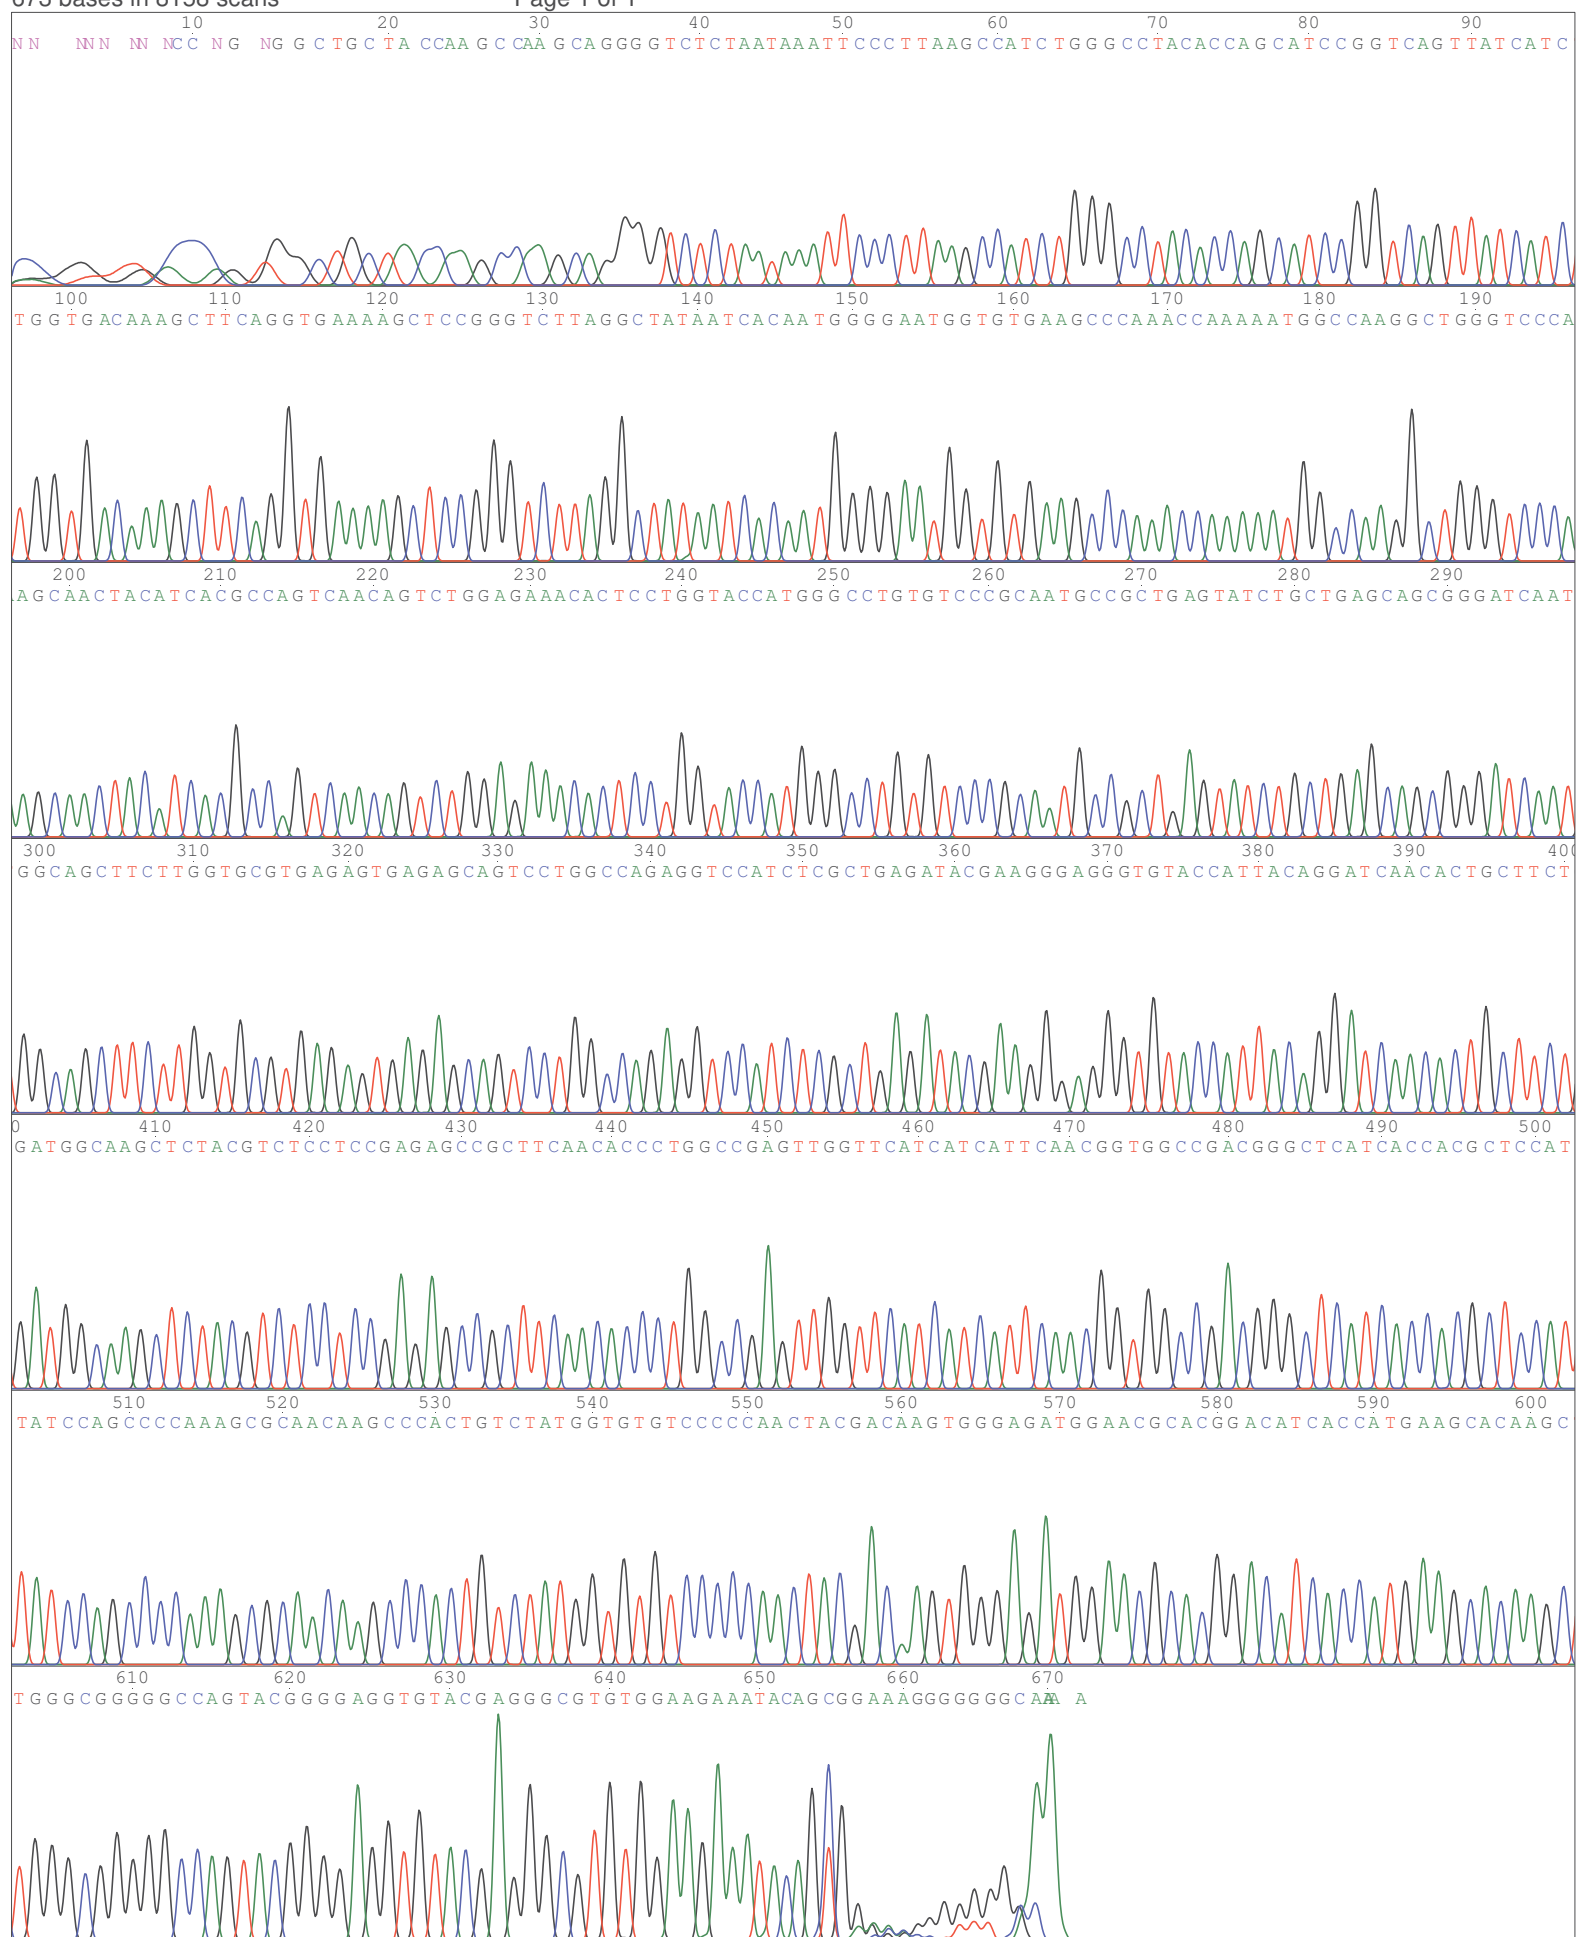

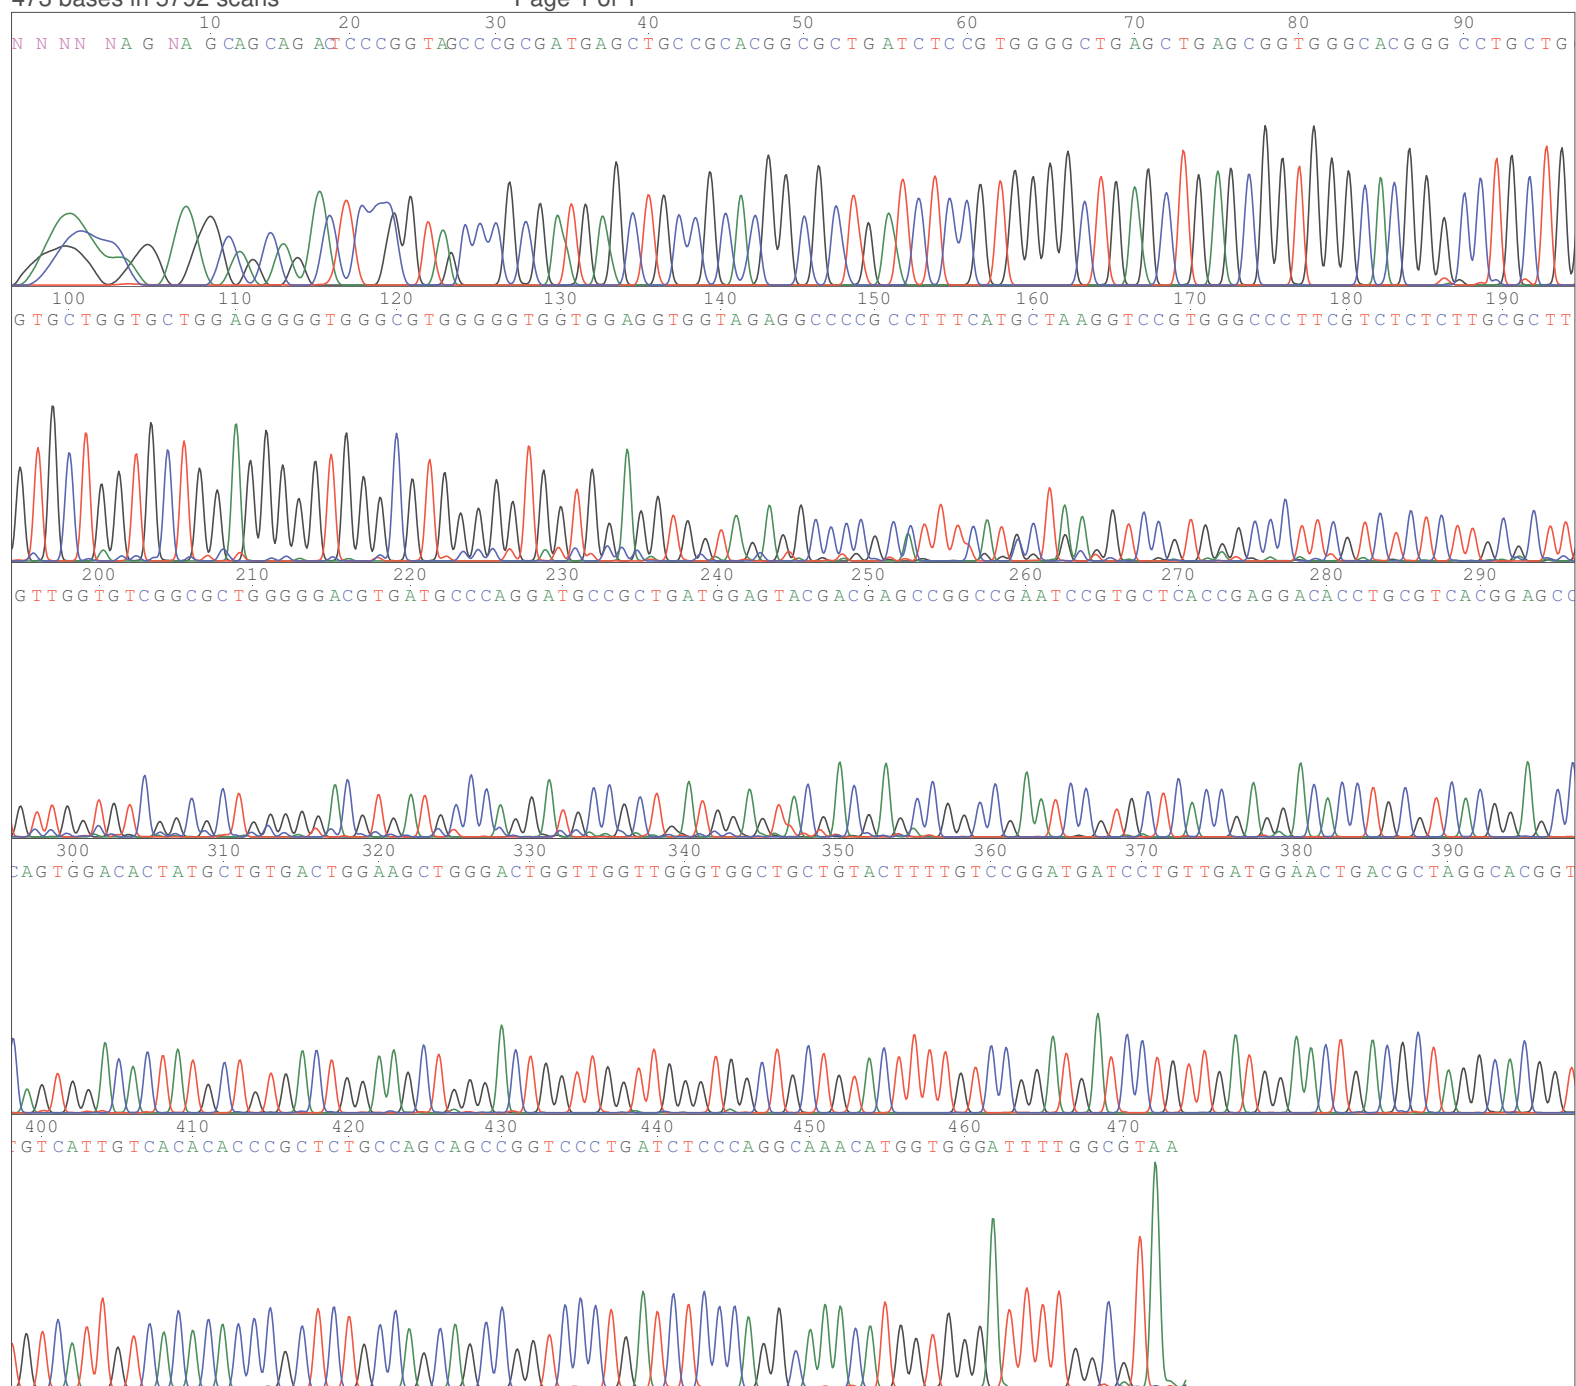

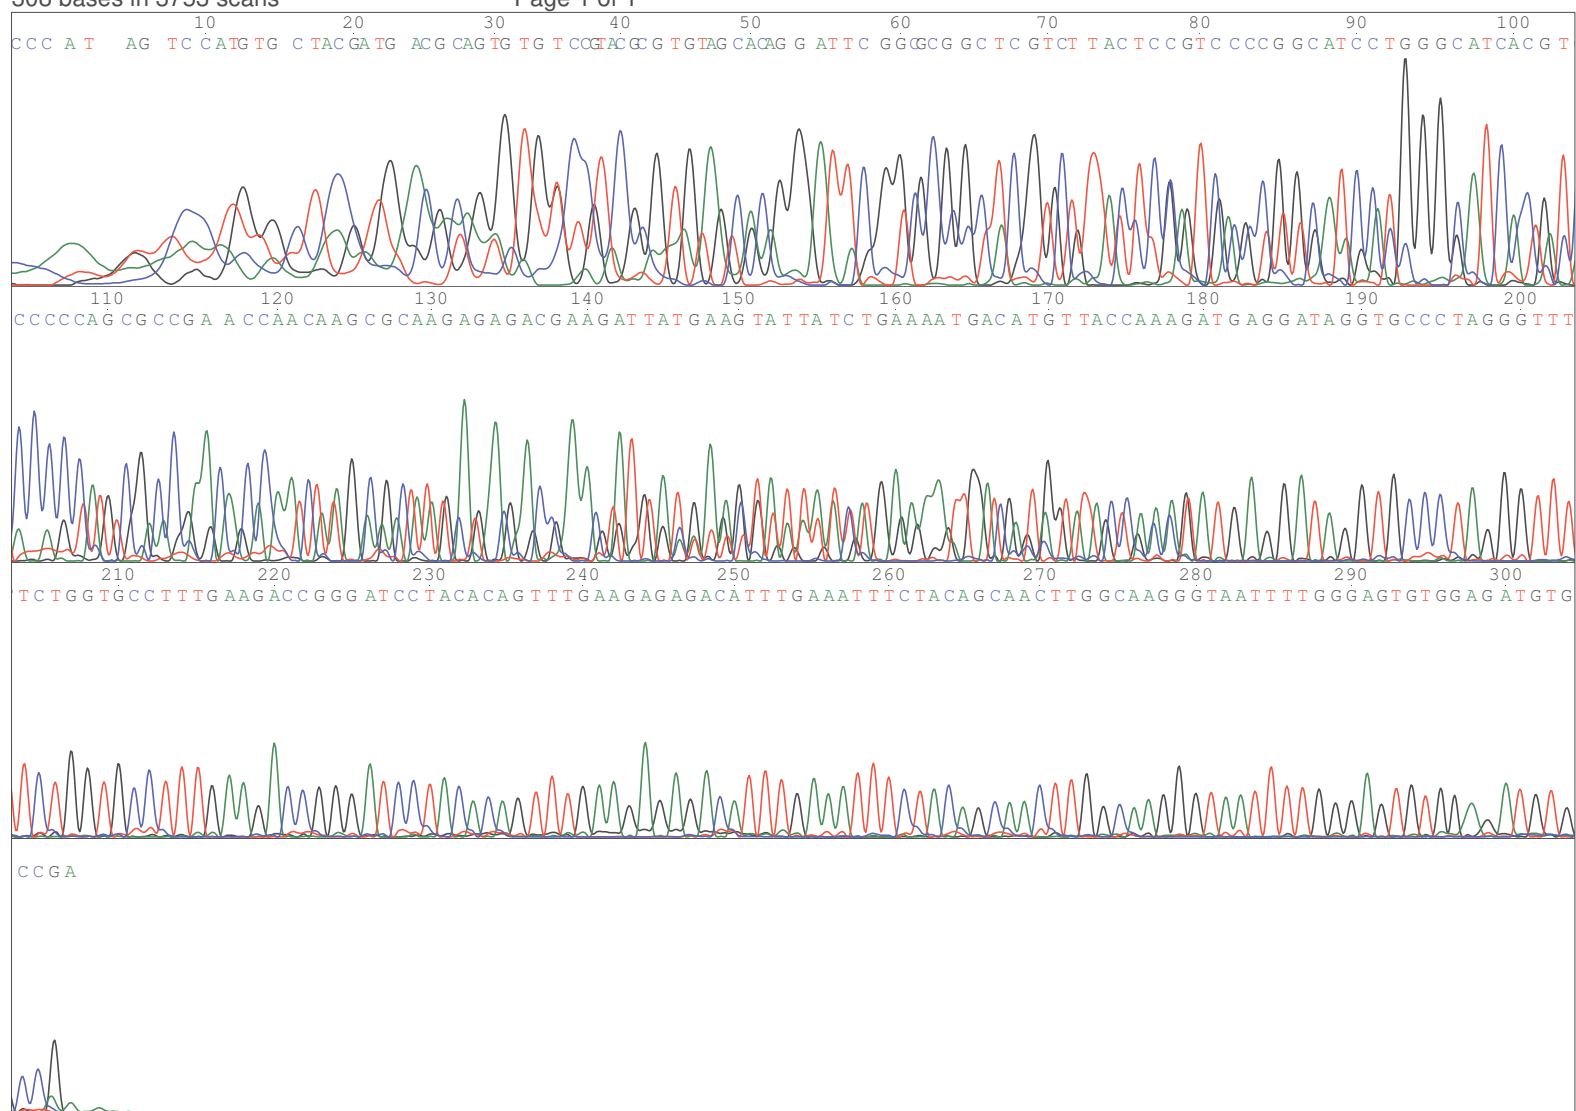

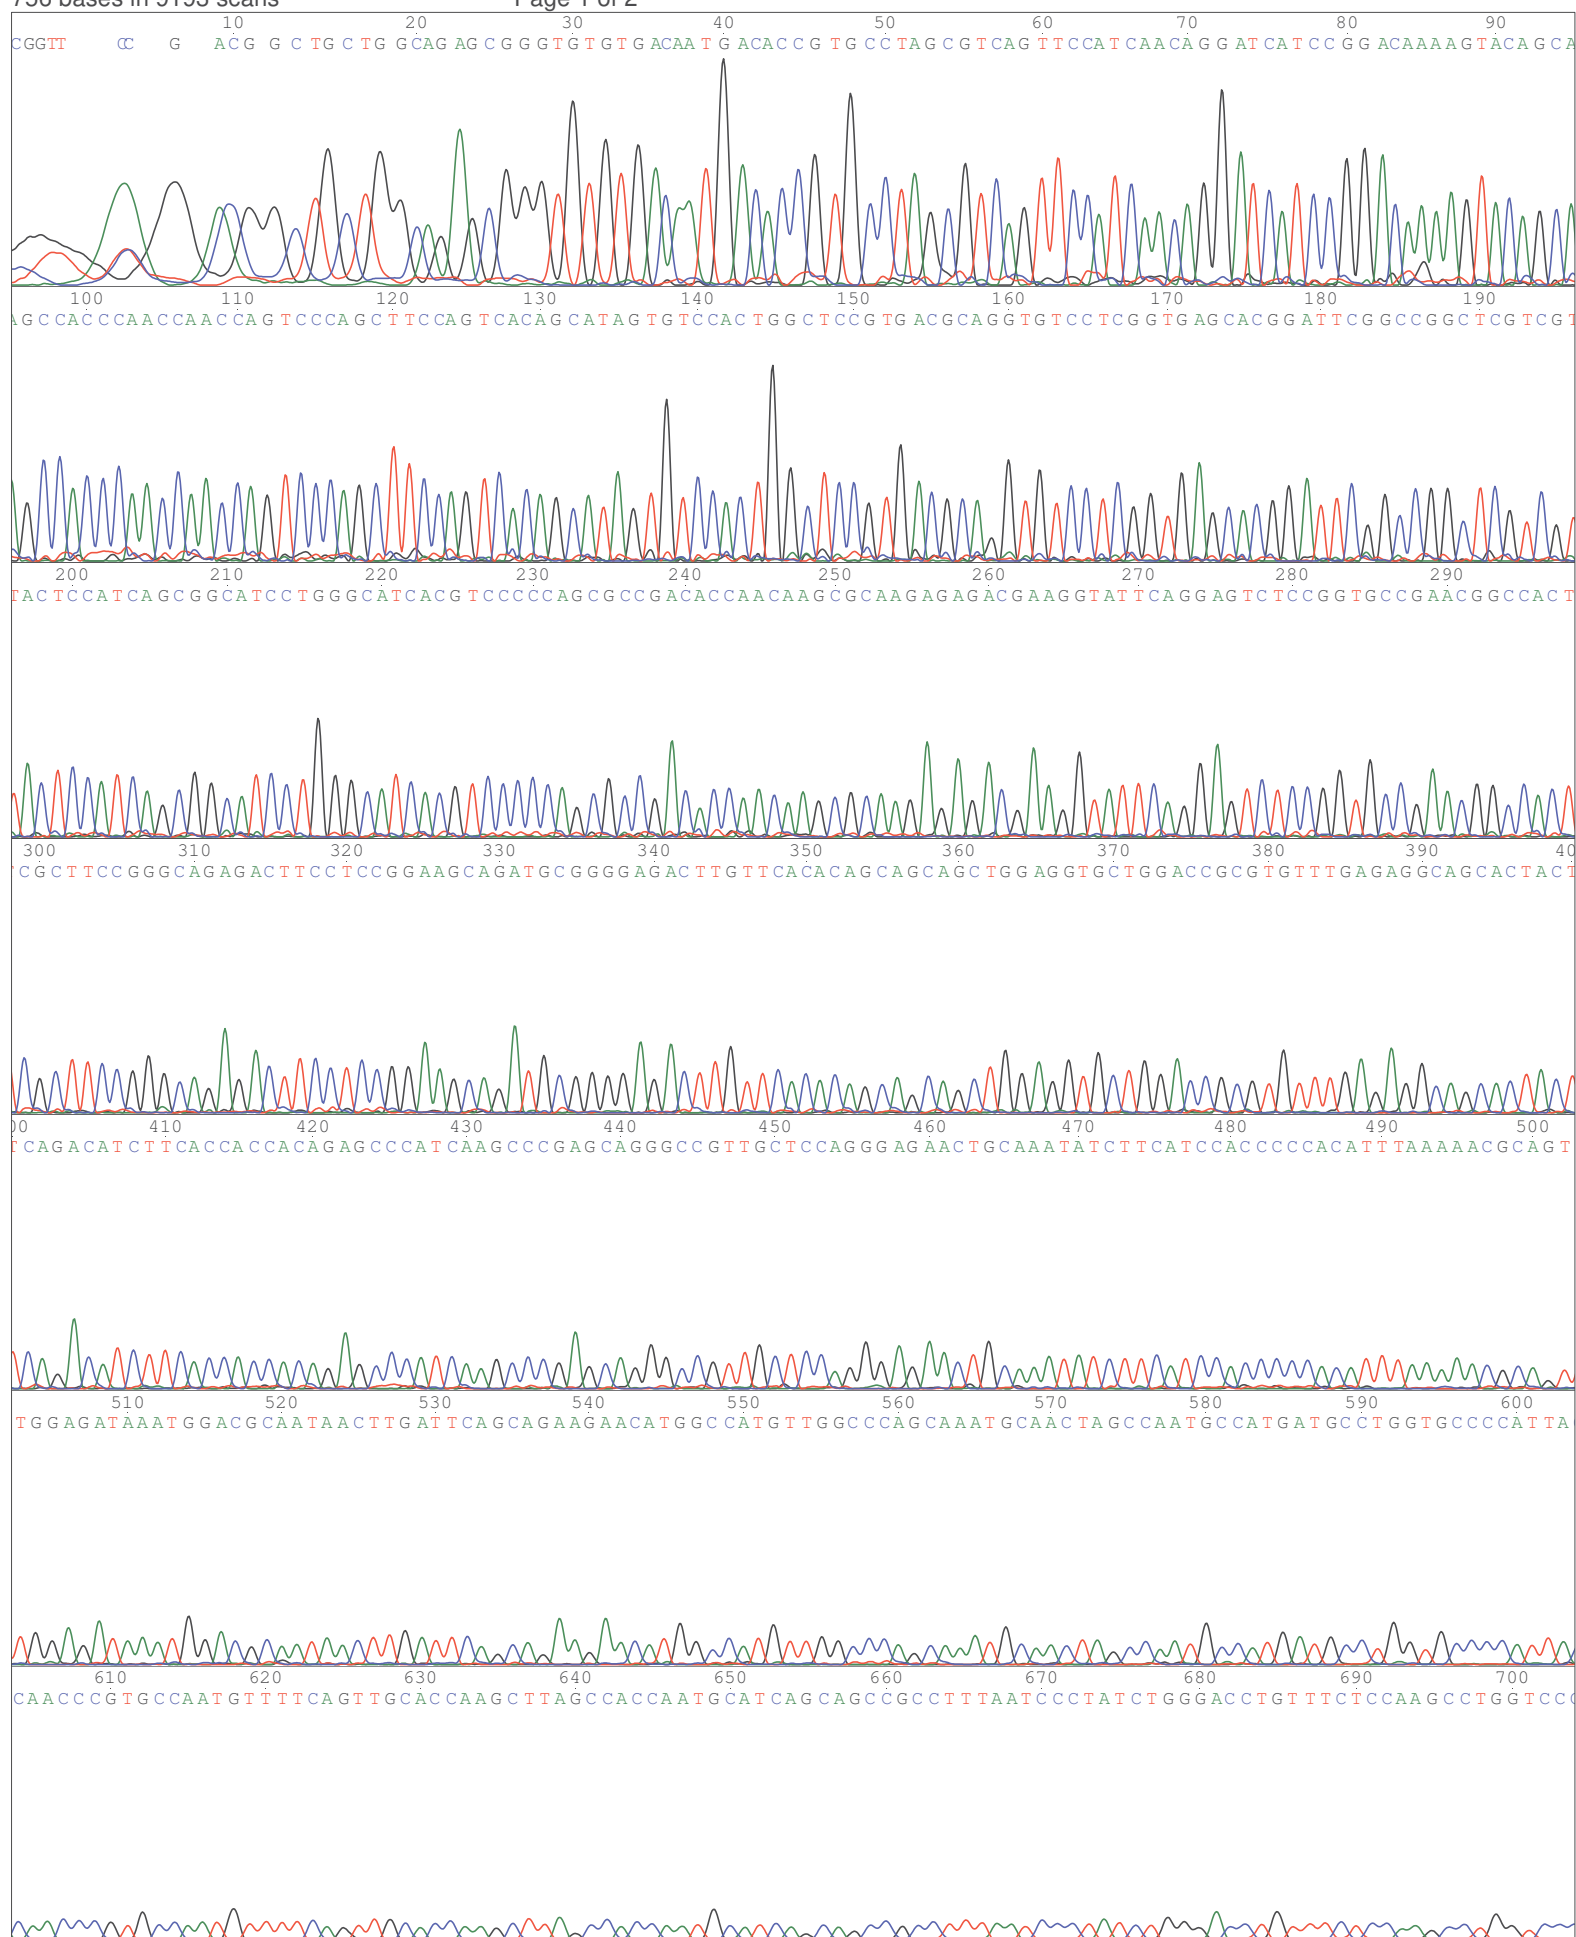

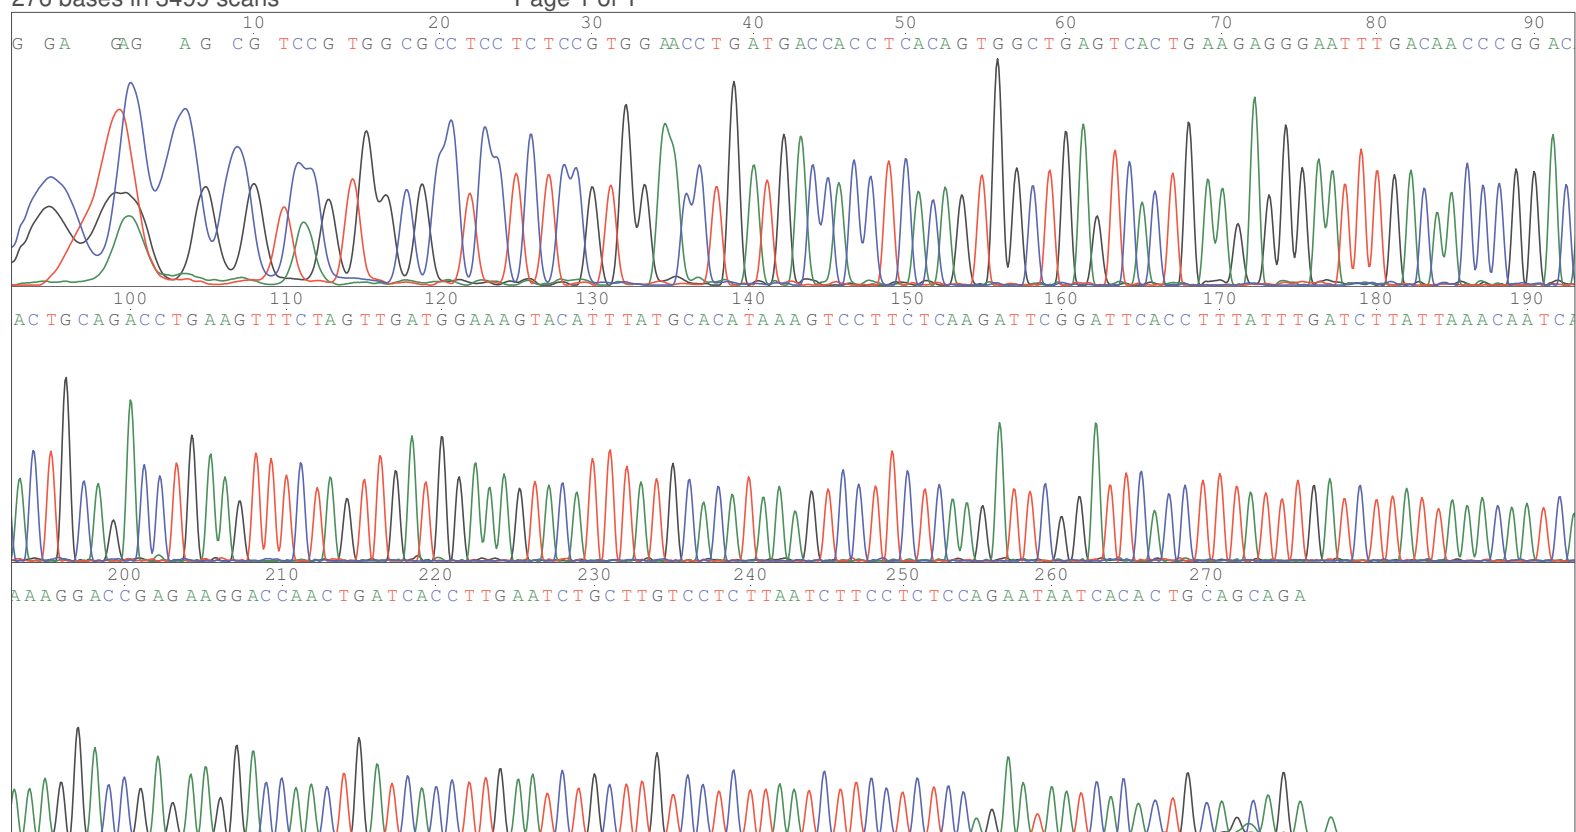



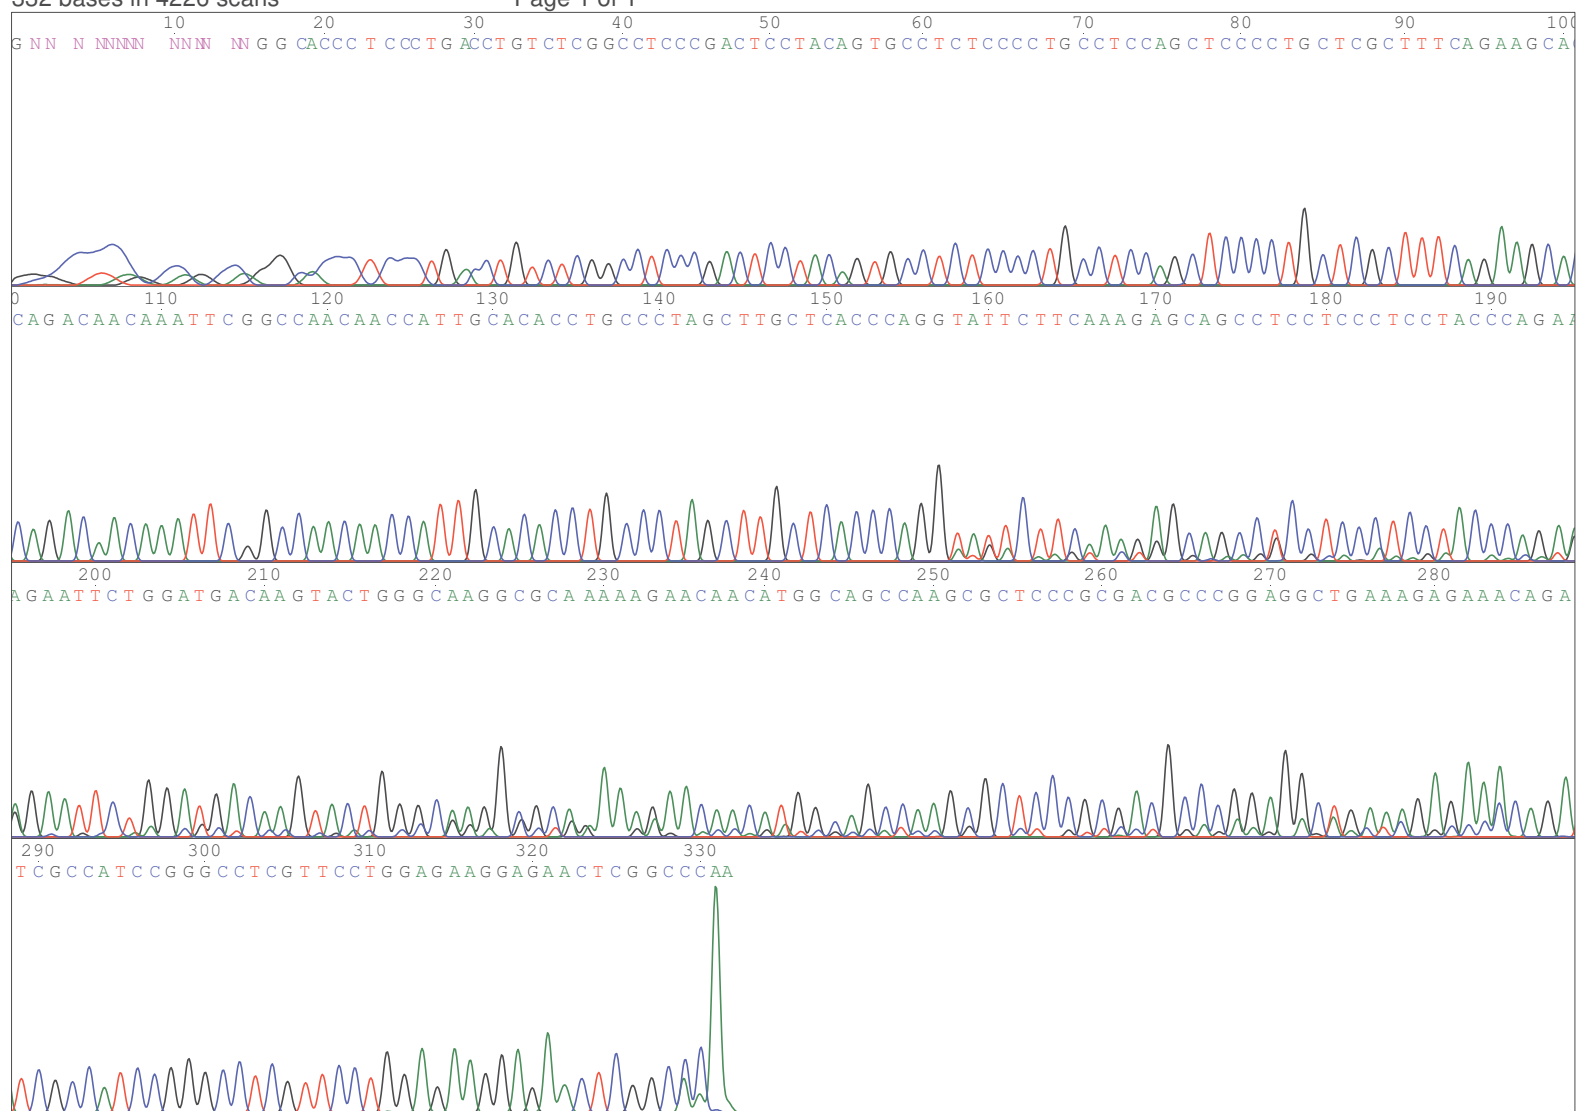

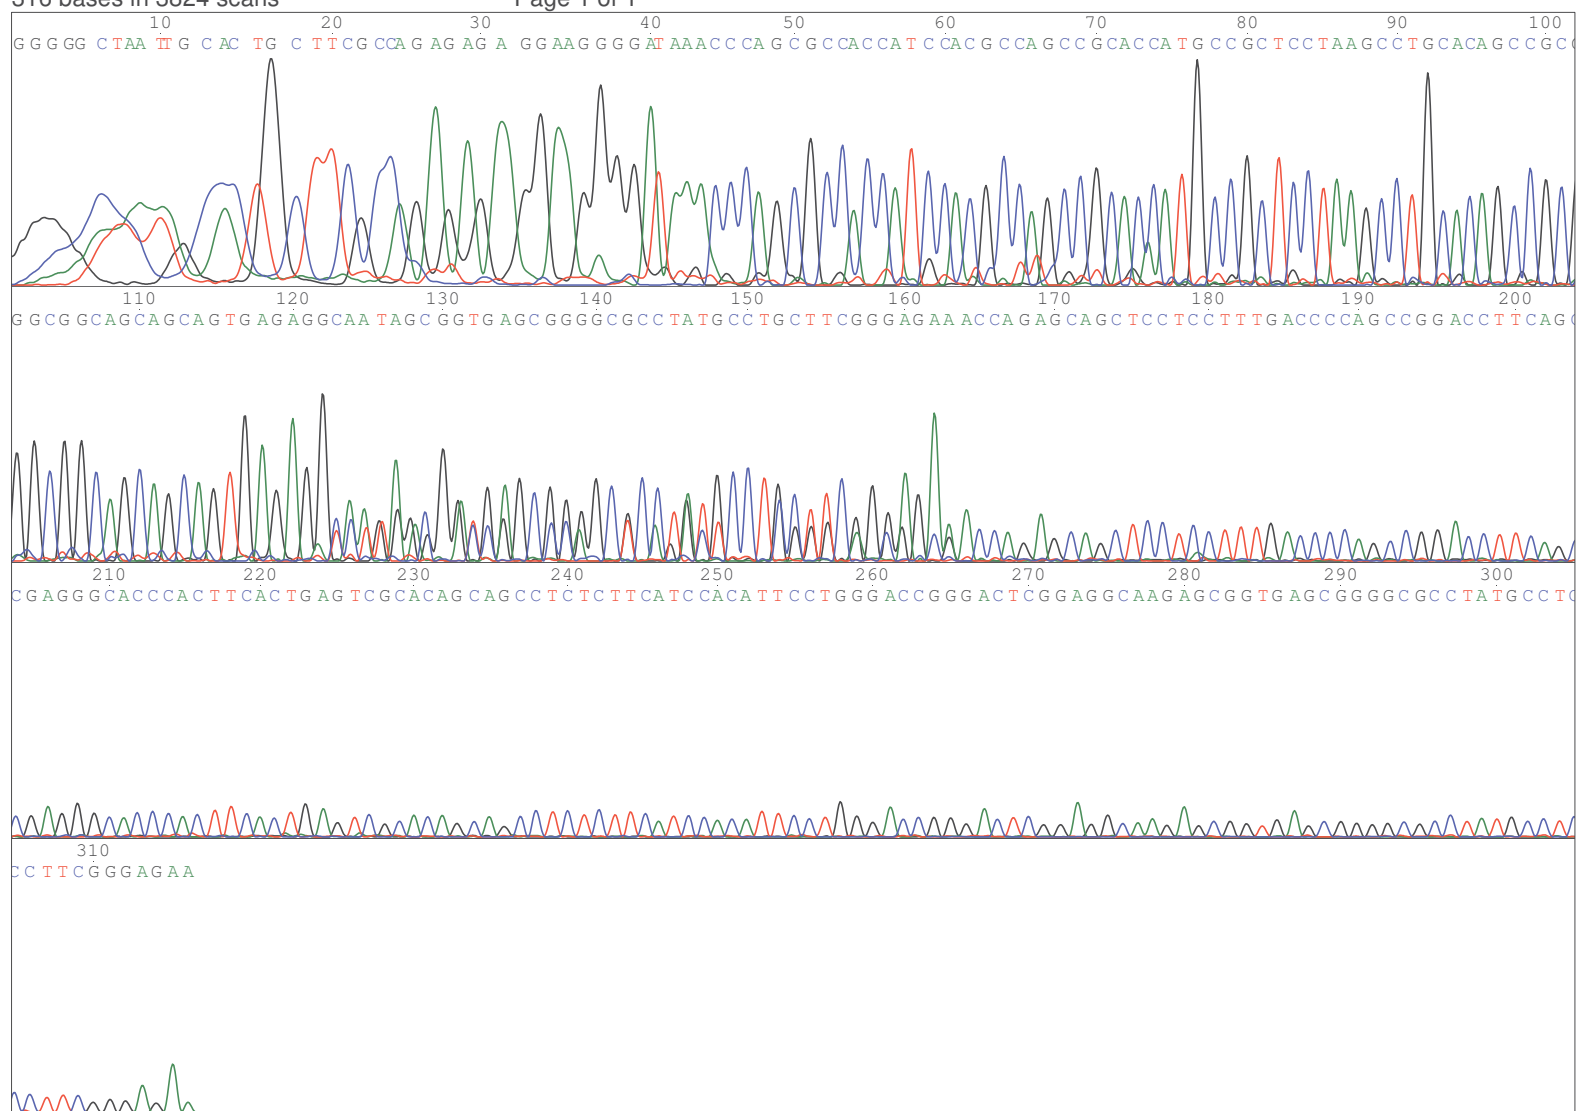

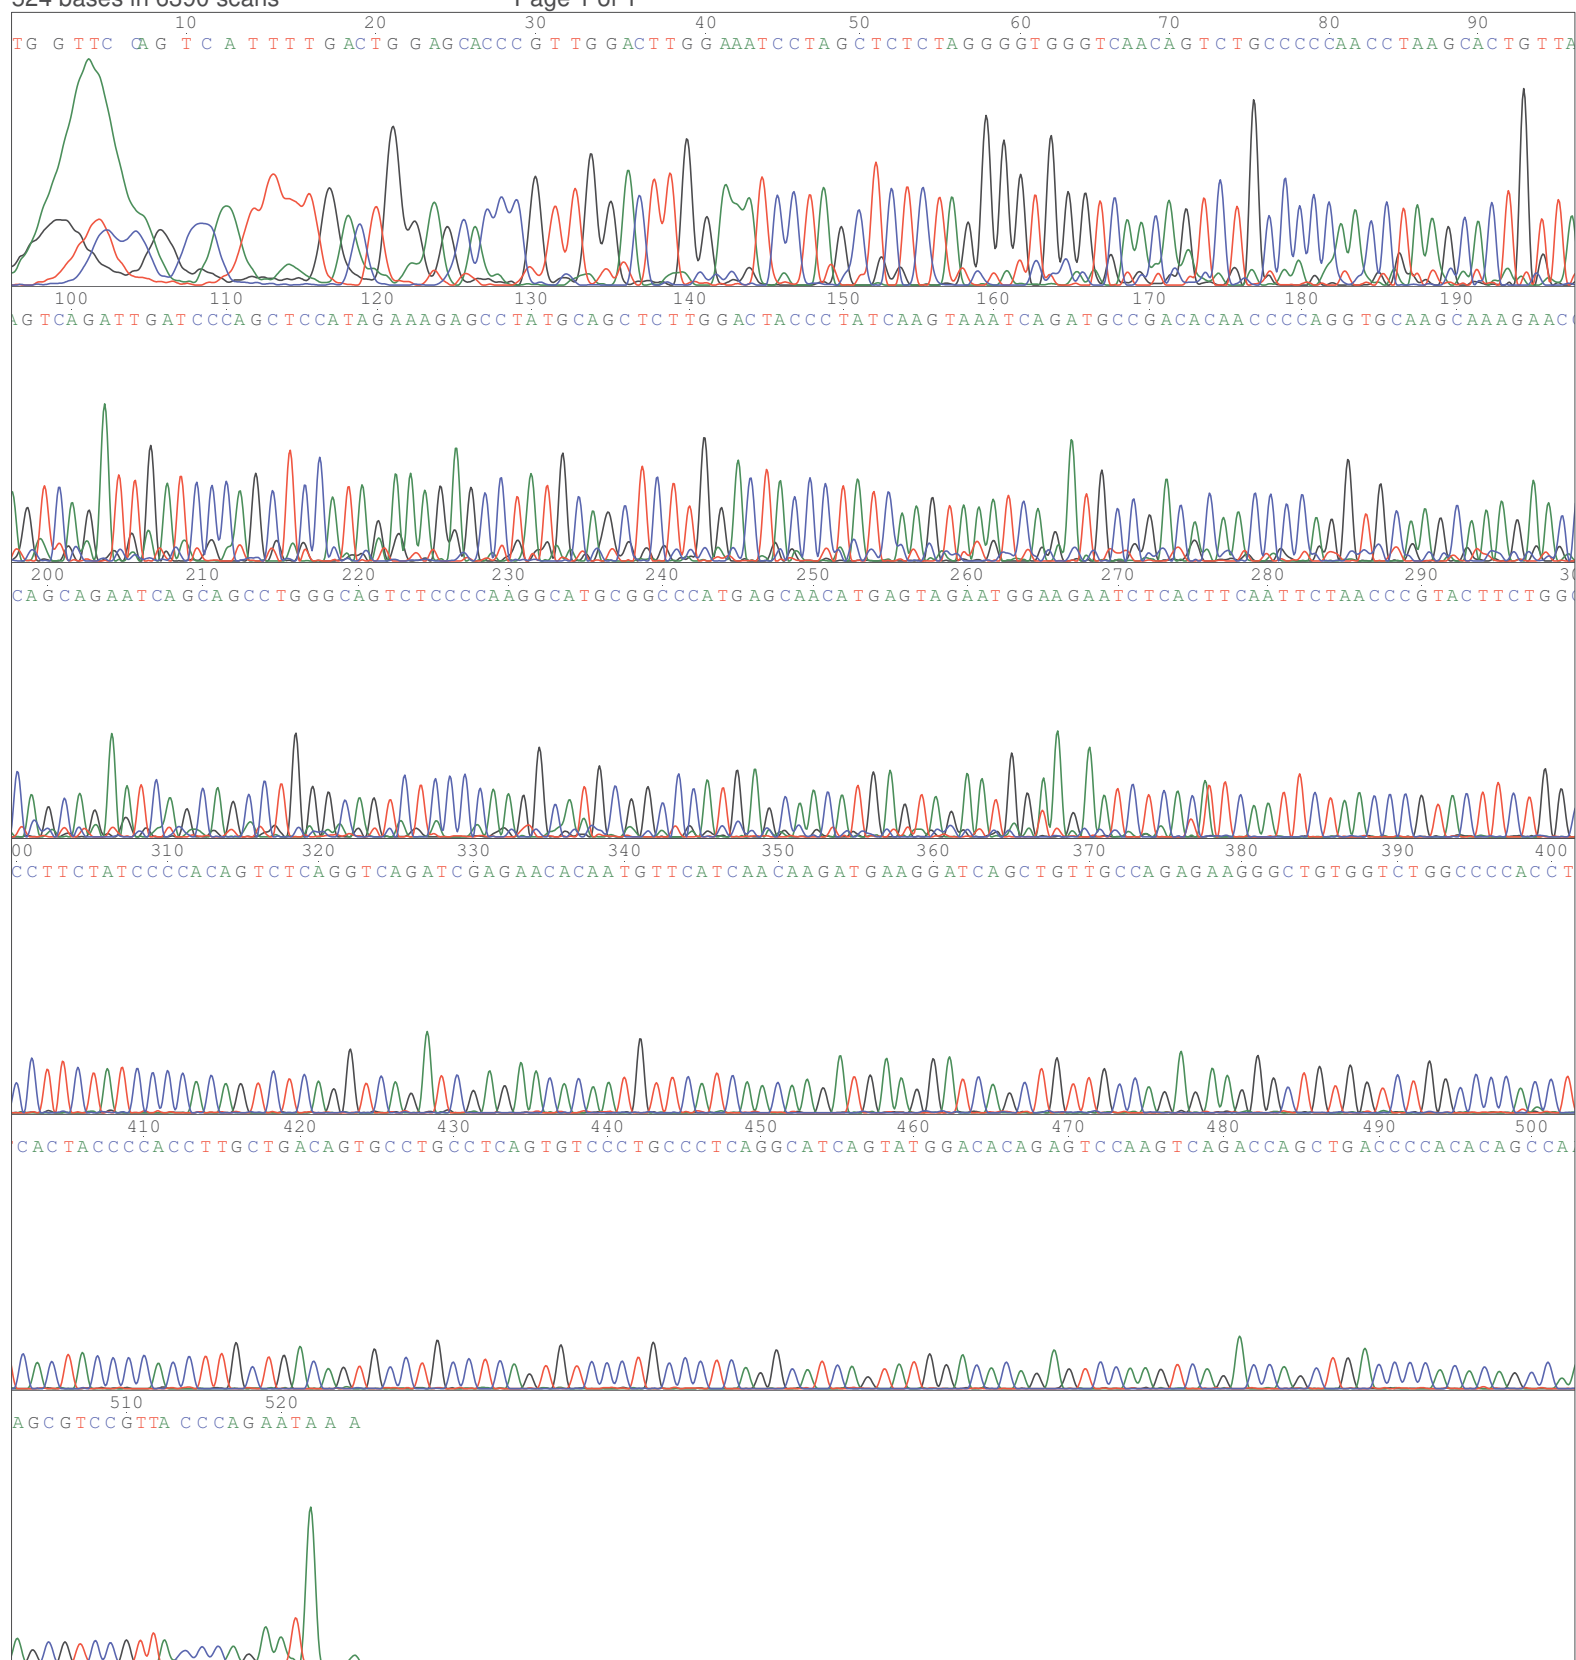

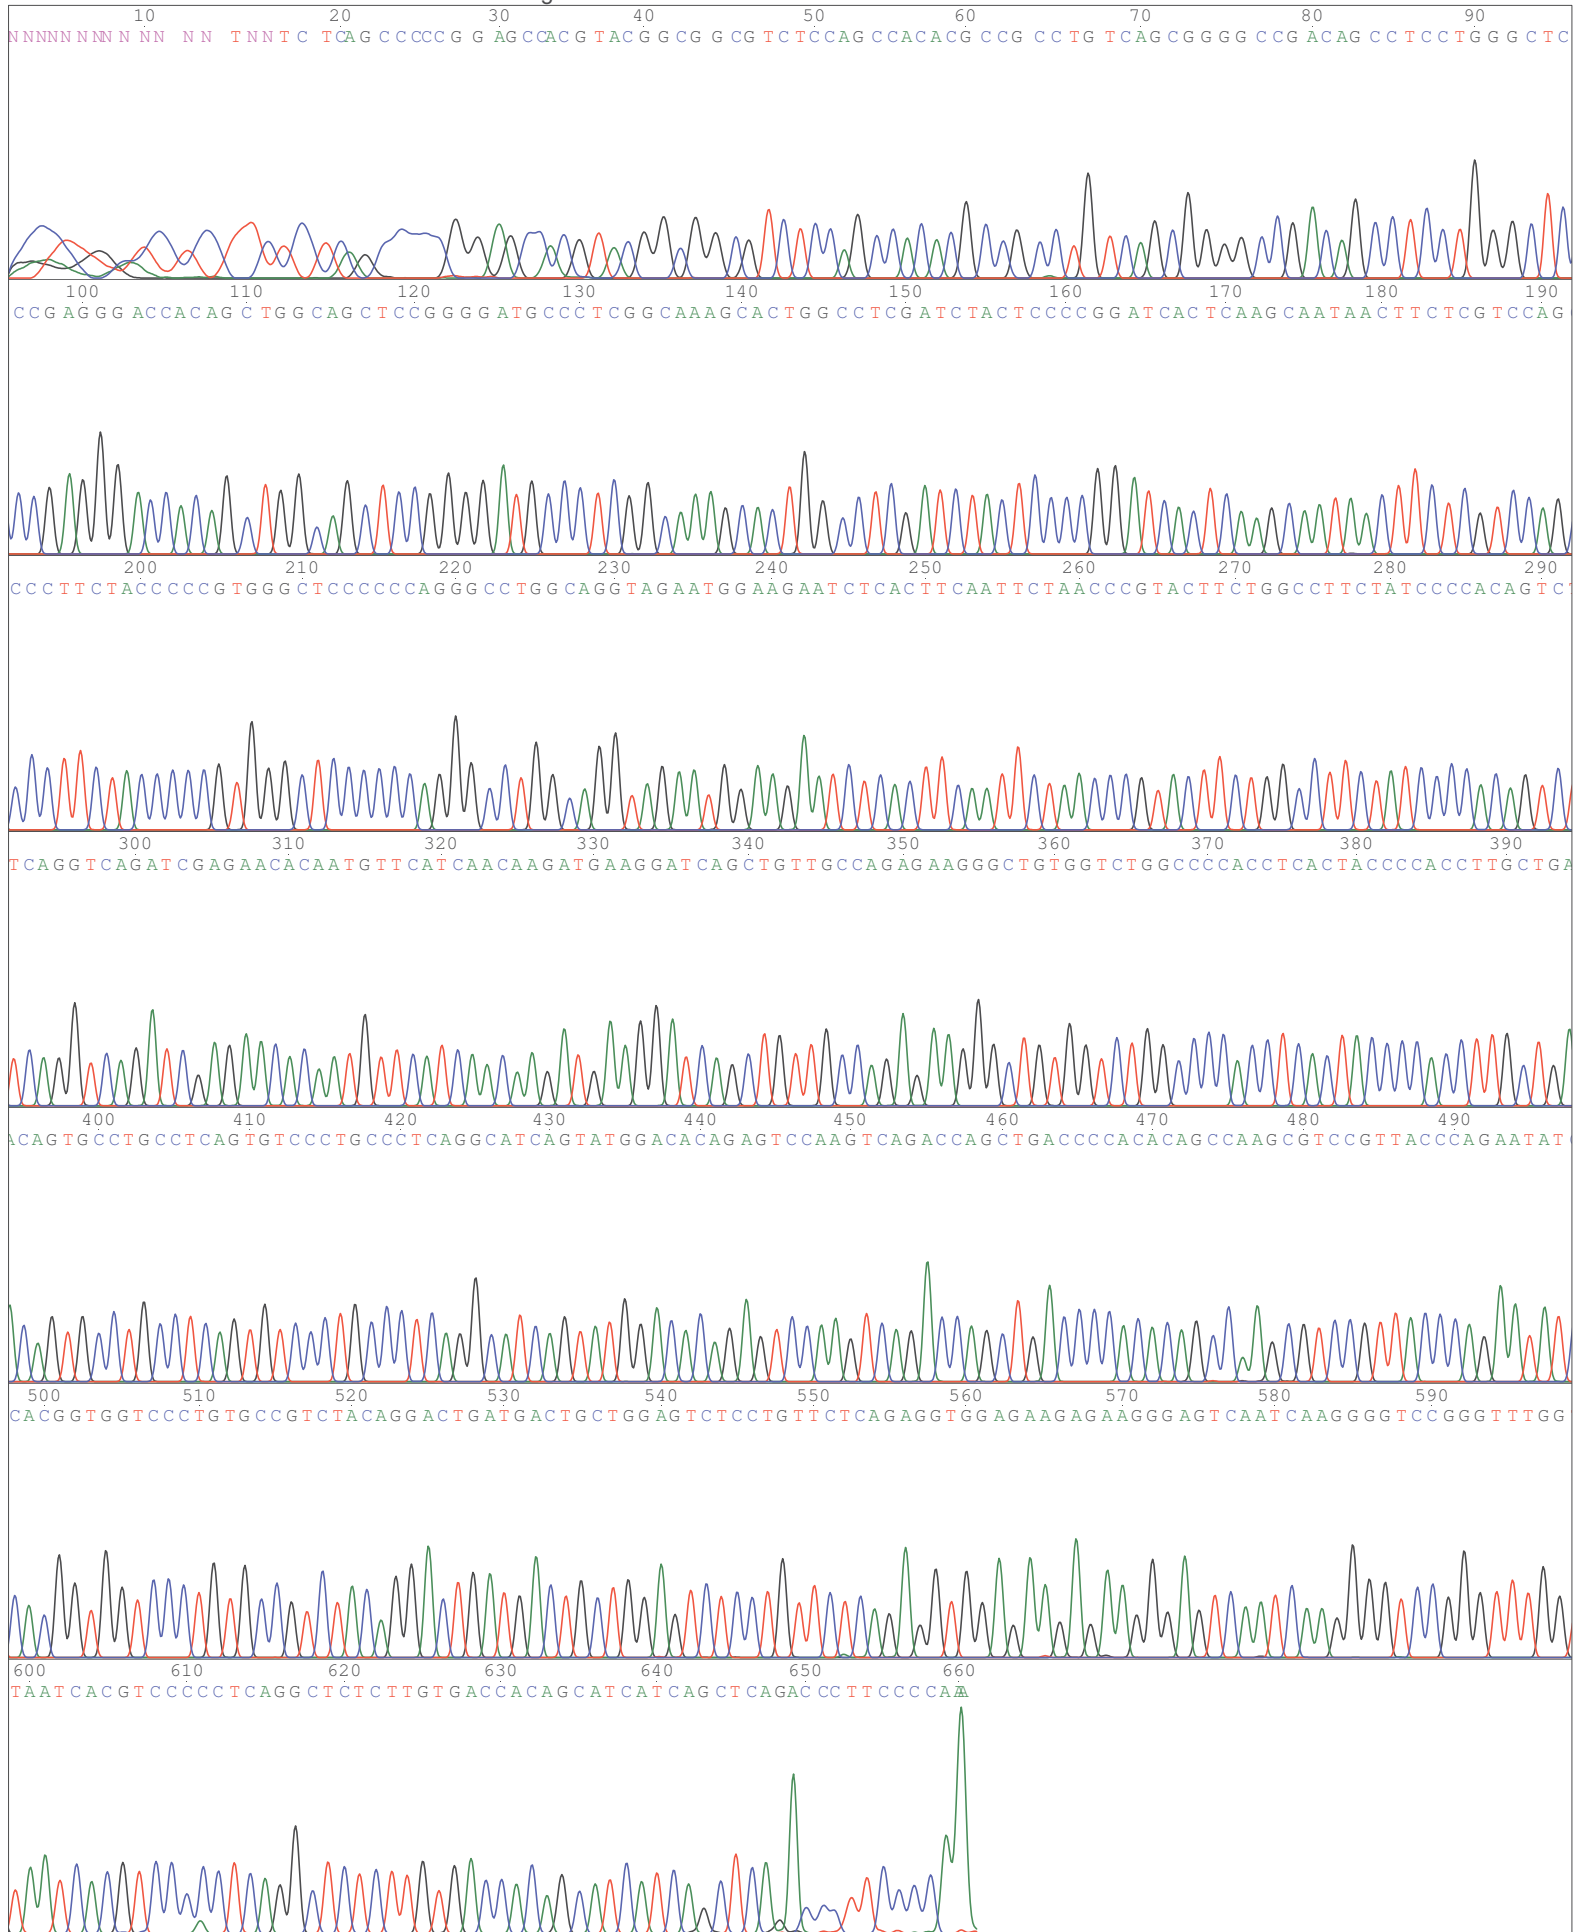

Supplement: hs9-3-e250-s001.pdf [file hs9-3-e250-s001.pdf]
